---

Original Manuscript

Title:

**Light stimulation into dorsal raphe nucleus contributes to antidepressant effect for a stressed rat model**

Authors:

Xiaotao Li,<sup>1,2,3,4\*</sup>

1 The Brain Cognition and Brain Disease Institute for Collaborative Research of SIAT at CAS and the McGovern Institute at MIT, Shenzhen Institutes of Advanced Technology, Chinese Academy of Sciences, Shenzhen, China. 2 McGovern Institute for Brain Research, Department of Brain and Cognitive Sciences, Massachusetts Institute of Technology, Cambridge, MA 02139, USA 3 State key laboratory of Brain and Cognitive Science, 4 Research Centre of Heart, Brain, Hormone and Healthy Aging, Li Ka Shing Faculty of Medicine, The University of Hong Kong, Hong Kong SAR, China.

\*Corresponding author. Email address: [xtli@mit.edu](mailto:xtli@mit.edu)

Abstract

**Background:** Light therapy is frequently demonstrated by clinical trials to be effective to seasonal or non-seasonal major depression. However, the pathway underlying the light effect on mood remains unclear. Since a retino-raphé pathway was previously indicated to modulate 5-HT production, we hypothesize that the retinal projection into dorsal raphe nucleus (DRN) may play an important role in the light therapy for depression.

**Methods:** A rat model of 14-day corticosterone administration (40 mg/kg/day subcutaneous injection) was mainly used to test the effect of light therapy on non-seasonal depressant-like behavior, and the involved neural circuitry and neurochemistry as well.

---

**Results:** Behavior results revealed that the bright light therapy especially with the blue light of 470 nm and 400 lux, effectively reversed the depression-like responses in those stressed rats. After elimination of retino-raphé projection using immunotoxin (Saporin) the effect of light therapy was significantly attenuated. Whereas activation of retino-raphé projection using HM3q chemogenetics was shown an effect similar to fluoxetine treatment. Furthermore, 5-HT3A positive GABA cells in the DRN were activated with high c-Fos expression that involved in an inhibition of 5-HT synthesis and a subsequent depressive behavior. While light therapy through retino-raphé projection deactivated the hyperaction of those GABA cells in the DRN; that eventually contributed to the antidepressant effect from light therapy.

**Conclusions:** Our results indicate that the retino-raphé circuitry engaged antidepressant effect in DRN that contributed to the light therapy to the non-seasonal depression. 5-HT3A positive GABA cells in DRN was indicated to mediate this function of retino-raphé projection.

**Key words:** depression, dorsal raphe nucleus, serotonin, retinal projection, light therapy, GABA.

---

## Introduction

Light is sufficiently powerful to exert an effect on affective states [1, 2]. Such as the duration of sunshine significantly modulated the mood of healthy people through serotonergic activity in their brains [3, 4]. Blue-enriched artificial light in the workplace was able to improve subjective alertness and performance [5, 6]. Moreover, recently clinical trials demonstrated that light therapy was not only effective for seasonal affective disorder (SAD, namely seasonal depression) [7], but also useful for non-seasonal depression (in which major depressive episode is not obviously associated with seasonal pattern) [8, 9]. Light therapy shows its promising in the treatment of depression with its unique advantageous including fast onset of function, economic low-cost as well as minimal side effect [10, 11]. However, the involved pathway underlying the light effect on mood is not well understood, particularly little is known about the visual pathway with light therapy for non-seasonal depression [12].

As a key source of serotonin (5-HT), dorsal raphe nucleus (DRN), controls 5-HT release into the forebrain and has a vital role in mood regulation [13, 14]. Currently available antidepressants like selective serotonin reuptake inhibitors (SSRIs) mainly based on the modulation of raphe system to reduce 5-HT turnover [15, 16]. A mouse model with tryptophan hydroxylase-2 (TPH-2) mutation in raphe nucleus, which was analogous to human mutation originally identified in a late-life depression cohort [17], showed significant depression-like behavior with the functional 5-HT deficiency [18]. On the other hand, the retinal projection into DRN, namely retino-raphé projection, exists in many rodents and primates [19-21], including the cat [22], Sprague Dawley rat [21, 23], Mongolian gerbil [20, 21], as well as monkey *Cebus apella* [19]. Even in the human brainstem an intensive response with the light stimuli can be detected using functional magnetic resonance imaging (fMRI) [2,

---

24]. Our previous study had indicated that retino-raphé projection could modulate serotonergic tone in DRN and subsequent affective behavior as well [20, 25]. Therefore, it is very likely that the retino-raphé projection may play an important role during the light therapy.

A depressive model induced with a high dose of stress hormone (as corticosterone in rodents) has been widely used to study the relationship between non-seasonal depression and adult neurogenesis [26-30]. High level of corticosterone could induce depression-like responses in rodents mainly through related glucocorticoid receptors (GR) and corticotrophin releasing factor (CRF) [31-33], also probably involved the pathway of phosphorylated cyclic AMP response element binding protein (CREB) and arrestin regulation [26, 32]. In this study, we used a rat model of depression induced by corticosterone administration in order to test the role of retino-raphé projection in the light therapy to non-seasonal depression. Our results revealed that this model was suitable for the study of light therapy and the retino-raphé projection was shown to be underlying the effect of light therapy for non-seasonal depression.

## **Methods and materials**

### **Animals**

Adult male Sprague Dawley (SD) rats (*Rattus norvegicus*, 250-280 g) were used in this study. They were kept in a 12:12 light / dark cycle (light cycle with 30-40 lux; dark cycle with ~0 lux) with food and water provided *ad libitum* (lights onset at 7:00 am; offset at 7:00 pm). All experiments were performed in accordance with policies on the utilization of animals and humans in neuroscience research and approved by the Faculty Committee on the Use of Live Animals in Teaching and Research (CULATR) in The University of Hong Kong, and the

---

counterpart in the Shenzhen Institute of Advanced Technology (SIAT), Chinese Academy of Sciences (CAS), China.

#### Corticosterone and fluoxetine administration

Corticosterone (CORT, C2505; Sigma-Aldrich, USA) at a concentration of 40mg/kg dissolved in sesame oil (Sigma-Aldrich, USA) was injected into SD rats for 14 days, according to the method of our previous work [34, 35]. Briefly, a stock emulsion of CORT was prepared daily by vortexing corticosterone in sesame oil for 10 min, followed by 60 min of sonication. Prior to every injection, the emulsion was vortexed briefly and injections were made subcutaneously in the neck region of the rat every 24 h. Control treatment was the same as above, but sesame oil was injected without CORT. The administration of fluoxetine (F132, Sigma-Aldrich, USA) was conducted according to previous reports [25, 36, 37]. Some rats were undergone daily intraperitoneal (ip) injection of fluoxetine for 14 days with the daily CORT injection. Each rat received injection of 10 mg/kg/day fluoxetine dissolved in saline each afternoon, after subcutaneous injection of CORT.

#### Bright light therapy

During the last 7 days of CORT injection, some rats in light-treated groups received the light therapy (n=6). Under the regular 12:12 L/D cycle of ambient light, blue ( $470 \pm 10$  nm) and full white light were respectively provided by light-emitting diodes (LED) placed approximately 30-50 cm above the rat cages. The intensity of LED light (100 ~ 400 lux) was detected by Lux meter (TM-209M, Tenmars, USA). The intensity of ambient light was only around 35 lux. While the intensity of blue light or white light was detected by lux meter at the bottom of the cage with the onset of ambient light, in order to match the real environment when they received the light therapy in morning. The light exposure was performed for 30

---

min each morning during the last 7 days of CORT injection. Onset of light therapy was at 7:00am each day, with the same onset time of ambient lighting. For an experiment of c-Fos test at the last day, those mice were respectively perfused with deep anesthesia after they were kept at the dark condition for 45 min following the 30 min duration of bright light therapy.

#### Force swim test (FST)

Rats were placed in a cylindrical glass tank filled with water (21-22°C) to a depth of 30 - 40 cm and the whole test was recorded by video. On the first day, the animals were placed in the cylinder for a 15 minute pre-exposure. Data were collected during a second test conducted 24 hours later. Then the animals were monitored for a period of 5 minutes by trained observers. The analysis of animal behavior included three types of behavior in the test, namely climbing, swimming and immobility. The definition of behavioral types and more detailed procedure were described previously [35, 38].

#### Sucrose preference test (SPT)

At the last four days of CORT or oil injection, the SPT experiment was started. The animals were firstly trained to drink a 1% sucrose solution by exposing them to sucrose solution instead of tap water for 24 h. They then were given a continuous 72 h two-bottle exposure to the 1% sucrose solution bottle and tap water bottle with the left/right location balanced across the cages. In order to prevent the possible deviation, two bottles were kept at same conditions using balanced location and were reversed the left/right location every night. At last 2 days, the bottles were weighed every 24 h at 10:00 am in the morning. The sucrose preference was determined as

$$(\Delta \text{ weight of sucrose}) / (\Delta \text{ weight of sucrose} + \Delta \text{ weight of water}) \times 100^{[39]}.$$

---

### Open field test (OFT)

The open field is a square arena (80cm length x 80cm wide x 40cm deep) with metal floors and wooden walls. Rats were placed in the center of the open field and allowed to freely explore the arena during a 10-minute test session. Both central and peripheral activities were measured using an automated video-tracking system. Percent of time in the center was defined as the percent of total time that rats spent at the central 26x26 cm area of the open field. Enhanced exploration of the unprotected central portion of a novel open field and reduced thigmotaxis were correlated with reduced anxiety levels [40].

### Corticosterone detection via ELISA

Blood samples of rats were collected at 19:00 pm, about 1 hour after the last CORT injection on the final day. Rats were anaesthetized and blood samples were collected from their tail vein within 3 min using a heparinized needle. Approximately 0.3 ml of blood was collected into a clean 1.5 ml microcentrifuge tube. Centrifugation (1000 rpm, 30 min and 4°C) of the samples was conducted then the serum was transferred into clean tubes and stored at -80°C. The CORT level was determined via a CorrelateEIA corticosterone kit (Assay design, USA). It was performed according to the manufacturer's instruction and was described previously [28, 34, 35].

### Selective elimination or activation of retino-rapha circuitry

The method using CTB injection into DRN followed by intraocular injection of anti-CTB-saporin conjugate could specifically eliminate the retino-rapha projection, which was described previously [25]. Briefly, rats were anaesthetized with ip injection of a mixture of ketamine and xylazine (2:1, v/v). They were placed in a stereotaxic apparatus and craniotomy was performed. A Hamilton syringe with a 27G needle was inserted and

---

stereotaxically positioned into the DRN regions, then CTB-conjugated Alexa Fluor 488 was deposited into DRN. The injection volume was 0.8  $\mu$ l/animal with 0.2  $\mu$ l sesame oil. The surgical area was cleansed and the incised tissues sutured. Three days after CTB injection, the animals were intraocularly injected with anti-CTB-Saporin (1 $\mu$ g saporin toxin /eye, anti-CTB: saporin = 1:1 mol ratio, Advanced Targeting Systems, Inc. San Diego, CA). Injection of anti-CTB-Saporin was also performed for each animal in the anesthetized condition. Eyelids were gently retracted with fingers to allow the eyeball to protrude. The injection was performed using a Hamilton syringe with a 35G needle into the posterior chamber of the eye and the needle was left in place for around 4 minutes. After around 3 weeks of the surgery, the DRN-projecting retinal ganglion cells (RGCs) were specifically eliminated in the retina of each animal. The control animals received DRN injection of CTB, and then intraocular injection of saline instead of anti-CTB-Saporin.

Using a similar method, intraocular injection of AAV8-Syn-HM3q-mCherry was performed into 2 eyes of those rats, meanwhile the AAV8-Syn-mCherry was injected into other rats as control group (n=5). After 3 weeks to express those virus, one cannula (200  $\mu$ m in diameter, NA: 0.37, RWD, China) was implanted into mid-DRN region (AP: -8.10 mm, ML: - 0.00 mm and DV: -6.30 mm). The rats were then given 1-week recovery time before behavioral FST experiment began. They were i.p. injected with CNO (0.5 mg/kg BW, Clozapine N-oxide, C0832, Sigma) 1hr followed by 2<sup>nd</sup> section of FST experiment. Saline or fluoxetine injection was also conducted as negative or positive controls (n = 5 rats each group).

#### Tissue collection and preparation

Following deep anesthesia, rats were perfused with saline (pH 7.4) followed by 4% paraformaldehyde (PFA) in 0.01M phosphate buffer (PB: pH 7.4). Retinas were collected followed by post fixation with 4% PFA for 45 min. Brains were removed from the skulls and



---

stored in the 4% PFA solution at 4°C overnight. The next day, brains were rinsed in 0.01M PB and then stored in 30% sucrose in 0.01M PB until they sank. The hindbrain including the mid-brain raphe complex was then serially sectioned at 30 µm intervals using a microtome. Brain sections were collected as six alternate sets of slices (with each set containing one section at 180 µm intervals throughout the hindbrain) and stored at -20°C in a cryoprotectant storage buffer (30% ethylene glycol, 30% sucrose dissolve in 0.01M PB; pH 7.4) until they were used to perform immunohistochemistry [41, 42].

### Immunohistochemistry

Tissues were rinsed in 0.01M PBS (pH 7.4) three times with 10 minutes each time, then incubated in blocking solution with 5% donkey serum in 0.1% Triton-X-100 of PBS for 1 h, followed by incubation of primary antibodies for 48 h at 4°C. The tissue sections were washed by 0.01M PBS (pH 7.4) three times with 10 minutes each time, and then incubated in matched secondary antibodies (1:500, Molecular Probes) for 2 h at room temperature, including Alexa Fluor donkey anti-rabbit 488nm-conjugated IgG, Alexa Fluor donkey anti-sheep 568nm-conjugated IgG, Alexa Fluor donkey anti-rabbit 647nm-conjugated IgG and so on. All sections were washed by 0.01M PBS (pH 7.4) three times with 10 minutes each time, finally cover-slipped by aqueous mounting medium (Dako Corp., Carpinteria, California, USA) [43, 44]. The primary antibodies included rabbit anti-c-Fos antibody (1:1000, PC38 (Ab-5), Calbiochem), rabbit anti-serotonin (5HT) antibody (1:1000, S5545, Sigma), sheep anti-tryptophan hydroxylase (TPH) antibody (1:1000, T8575, Sigma), rabbit anti-corticotropin releasing factor (CRF) antibody (1:500, ab8901, Abcam), rabbit anti-glutamate antibody (1:1000, G6642, Sigma), mouse anti-GAD67 antibody (1:1000, MAB 5406, Chemicon), mouse anti-GABA antibody (1:1000, A0310, Sigma), rabbit anti-5-HT3A antibody (1:200; ab13897, abcam), mouse anti-parvalbumin (PV) antibody

---

(1:1000, P3088, Sigma) as well as rabbit anti-somatostatin (SOM) antibody (1:100, AB5494, Millipore). In addition, stain of anti-glutamate, anti-GAD67 and anti-SOM antibodies on brain sections sometimes used a tyramide signal amplification (TSA, T20934, Molecular probes) kit according to the manufacturer's protocol [45].

#### Immunoperoxidase staining

A serial sections including the midbrain raphe complex were used for immunoperoxidase staining. The primary antibodies included those against c-fos (rabbit anti-c-Fos polyclonal antibody, 1:3,000; PC38 (Ab-5), Calbiochem (EMD Chemicals)), tryptophan hydroxylase (TPH; sheep anti-TPH antibody, 1:10,000; T8575, Sigma), phospho-CREB (p-CREB; rabbit anti-phospho-CREB monoclonal antibody, 1:1000; #9198, Cell signaling Technology), GAD-67 (mouse anti-GAD67 antibody, 1:1000; MAB 5406, Chemicon) as well as 5-HT3A (rabbit anti-5HT3A receptor antibody, 1:200; ab13897, abcam). The procedure for double immunostaining of c-Fos and TPH was described here briefly. Tissue serial sections were washed by 0.01 M PBS in 12-well plate, twice 15min with shaking; then rinsed in 1% H<sub>2</sub>O<sub>2</sub> in PBS for 15 min, followed by washing in PBS for 15 min and pre-incubation in 0.1% PBST for 1 h. Sections were then incubated overnight at room temperature (RT) with rabbit anti-c-Fos antibody (1:3,000) in 0.1% PBST. After about 16 h incubation, the tissue was washed twice in PBS, 15min each time with shaking; followed by incubation with a biotinylated goat anti-rabbit secondary antibody (1:200, E043201, Dako) in 0.01 M PBS for 90 min. Tissue was washed 2x15 min in PBS and then incubated in an avidin-biotin-peroxidase complex (Elite ABC reagent, 1:200; PK-6100, Vector Laboratories) in 0.01 M PBS for 90 min. Tissue was then washed 2x15 min in PBS, and incubated in a peroxidase chromogen substrate (Vector SG, SK4700, Vector Laboratories; diluted as the instruction) in 0.01 M PBS for 20 min. After the chromogen reaction, tissue sections were

---

immediately washed in 0.01 M PBS twice, 15min each time with speedy shaking; then rinsed in 1% H<sub>2</sub>O<sub>2</sub> for 5 min and washing in PBS for 15 min followed by 1 h pre-incubation of 0.1% PBST. Then, sections were incubated with sheep anti-TPH antibody (1:10,000) in 0.1% PBST overnight at RT. All subsequent steps were identical to those described above for the staining of c-Fos antibody, except for the secondary antibody and chromogen reaction steps; in which a biotinylated rabbit anti-sheep secondary antibody (BA-6000, 1:200; Vector Laboratories), and a peroxidase chromogen substrate (DAB substrate kit, SK-4100, Vector Laboratories; diluted as the instruction) in the distilled water for 5 min. Finally, sections were washed twice in PBS to stop the reaction, then mounted on microscope slides and mounted with coverslips after dehydrated treatment. The color reaction of the c-Fos immunostaining will be blue-black and localized to the nucleus, whereas TPH immunostaining was orange-brown and localized to the cytoplasm. The immunostaining process of p-CREB (1:1000), GAD-67 (1:2000) and anti-5HT3A (1:200) was similar to those described above [41, 46].

#### DRN location and analysis

Serial brain sections of DRN (30  $\mu$ m) were obtained from adult male SD rats. One sixth sections were immunostained with a rabbit anti-5HT antibody (S5545, Sigma) or a sheep anti-TPH antibody (T8575, Sigma), which can indicate the area of DRN filled with serotonergic neurons. According to the different distances from bregma, subregions of DRN can be divided into the rostral portion of DRN (~from -6.92mm to -7.64mm), middle portion of DRN (~from -7.73mm to -8.45 mm) and caudal portion of DRN (~from -8.54mm to -9.26mm). Moreover, the three subregions of DRN can be further divided into dorsal part of DRN (DRD), ventral part of DRN (DRV), ventrolateral part of DRN (DRVL), interfascicular part of DRN (DRI) and caudal part of DRN (DRC). Then MRN represent

---

median raphe nucleus, which does not belong to DRN. The anatomy of DRN was described according to a classic rat stereotaxic atlas [47]. Based on that method, quantification of serotonergic neurons was performed in different subregions of DRN [48].

#### Data analysis

Data were shown as means  $\pm$  SEM. The student T-test was used for comparisons between two groups, whereas one-way ANOVA was applied to compare three or more groups of data, followed by Newman-Keuls or Tukey multiple comparison test using the Prism 5.0 software. Tukey multiple comparison test was marked at those results when it was able to choose to conduct further statistics. A probability (P) value of  $<0.05$  was considered at the statistically significant level while the  $<0.01$  was at the remarkably significant level.

## Results

### **Light therapy reversed the depressive-like behavior in the stressed rats caused by corticosterone administration**

A rodent model of depression induced by the high level of stress hormone, corticosterone (CORT) with 40 mg/kg/day for 14 days, was able to be evaluated by forced swimming test (FST) (Fig 1 A), sucrose preference test (SPT) (Fig 1 B) as well as body weight change (Fig S1), respectively. And this type of depressive-like responses caused by high intake of CORT could be reversed by a typical SSRI drug, fluoxetine (10 mg/kg/day for 14 days, Fig 1 A and B). Moreover, our data in the FST clearly indicated that both white and blue light therapy were able to significantly reverse the depression-like responses in those stressed rats (Fig 1

---

C-E and Fig S2). The blue light therapy was demonstrated to exhibit a better efficacy compared with that of white light therapy at the same intensity (Fig 1 C and D), especially using the 400 lux blue light therapy (470 nm, 400 lux, 30 min each morning for 7 days; see Fig 1C, E and Movie S1; typically, the change of immobility time at Fig 1E and 2A,  $p < 0.001$ , Blue-400 or Saline vs CORT groups). The sucrose preference in the saline-injected group was also enhanced significantly with the blue light therapy ( $p < 0.001$ , Saline vs CORT groups) although they had already received the CTB injection into DRN before initiating the light therapy (Fig 2B). While revealed by open field test (OFT) (Fig 2 C), those stressed rats did not display obvious anxiety-like behavior, which was consistent with some previous reports [35, 49]. Neither 100 lux blue light or 100 lux white light exhibited sufficiently significant efficacy (Fig 1 C,D and Fig S2). The red light of 100 lux that belonged to the highest intensity of red light we could apply with our light source was unable to reverse the immobility time of those depressed rats significantly (Fig S2 G).

Hence, it was indicated that the effect resulted from the light therapy for a week was sufficiently effective for those stressed rats to reverse their depressive behavior, in particular using the 400 lux blue light therapy. The rat retinas have been indicated to be very sensitive to the blue light (450 nm - 495 nm) through their classical photoreceptors and melanopsin photoreceptor [50, 51], which could be the main reason for the efficacy of blue light therapy over the white light therapy (Fig 1 E,  $p < 0.001$ , Blue-400 vs CORT groups;  $p < 0.05$ , White-400 vs CORT groups).

**Manipulation of retino-raphé circuitry effected on antidepressant function of light therapy**

---

There was a distinct retino-raphé projection in the SD rat including average 700 DRN projecting RGCs each retina (Fig 3); among them, the majority belonged to alpha cells (approximately 72%, Fig 3C and S4) and around 10% melanopsin cells as well (Fig S4) (Li et al.). While Saporin (SAP) injection was performed to specifically eliminate their retino-raphé projection prior to the start of light therapy, the number of DRN projecting RGCs dramatically decreased from an average 700 to 150 cells in each retina (Fig 3,  $p < 0.001$ , Saline vs SAP group, independent student's t-test). Thus the antidepressant effect from the light therapy for those stressed rats has been significantly attenuated after elimination of their retino-raphé projection; this was strongly supported by behavioral tests including FST and SPT (Fig 2 and Fig S3). These results suggest retino-raphé projection mediates the effect of light therapy since the elimination of the retino-raphé projection led to the significant attenuation of the antidepressant effect resulted from the light therapy.

It was unable to completely abolish the DRN-projecting RGCs using those saporin treatment, but approximately 80% of DRN projecting RGCs was abolished (Fig 3), which was similar to some related studies [25, 52]. However, the attenuation of 80% retino-raphé connection was already sufficient to block the antidepressant effect from light therapy as both indicated by FST and SPT (Fig 2 A and B,  $p < 0.001$ , Saline vs CORT groups;  $p < 0.05$ , Saline vs SAP groups). It was not surprising that the stressed rats in the SAP-injected group still had a little increase of swimming time resulted from light therapy compared with that in the CORT group without the treatment (Fig S3 A). The reason was probably due to the ability of remaining DRN-projecting RGCs to still receive some signals from light therapy. Furthermore, the result of HM3q function to activate retino-raphé circuitry (Fig S3 C) consistently indicated the contribution of retino-raphé circuitry to antidepressant-like effect, also similar to the fluoxetine effect that was as positive control in this FST experiment.

---

### **Significant c-Fos change happened in GABA cells in the subregion of DRN with corticosterone administration and light therapy**

In terms of the c-Fos expression in the DRN (Fig 4 and Fig S5), those rats underwent noticeable alteration of c-Fos expression resulted from the high intake of stress hormone and also the effect of light therapy. DRN c-Fos expression was activated by corticosterone administration firstly then suppressed by light stimuli dramatically (Fig 4 and Fig S5), especially in the lateral wings of middle DRN, namely DRVL parts (Fig 4 F,  $p < 0.05$ , Oil-ctrl vs CORT groups;  $p < 0.01$ , CORT vs Co+Li groups; One-way ANOVA with Tukey's multiple comparison test). Other subregions of DRN have not showed significant change between CORT group and light group except for the middle DRN and DRVL part (Fig 4 and Fig S5); this implicated the DRVL part of middle DRN was mainly charge of the noticeable change of c-Fos in whole DRN. A phosphorylated cyclic AMP response element binding protein (p-CREB) was regarded as the upstream factor of c-Fos [53, 54]; the trend of its changed supported the results of c-Fos alteration in DRN (Fig S6) although the p-CREB change was not statistically significant. Furthermore, as shown in Fig 4 G, the increase of c-Fos expression with corticosterone administration predominantly accounted for the activation of GAD67 positive GABA neurons (Fig 4 G, increased from 32% to 78% about GAD67 positive c-Fos cells; Fig S7 C, also increased from 15% to 55% about c-Fos positive GABAergic cells), rather than TPH positive serotonergic neurons (Fig S7 D and E, remaining ~25% TPH positive c-Fos cells with ~5% c-Fos positive TPH cells, no significant change). The hyperaction of GABAergic interneurons further induced the 5-HT synthesis inhibition indicated by quantification of TPH positive cells (Fig 5 H), which most likely associated with the depressive-like response as showed an increase of immobility time in FST and a decreased sucrose preference in SPT (Fig 1) [55]. However, light signals transmitted from the

---

retino-raphé projection suppressed the c-Fos expression in the DRN at the light time with or without CORT administration (Fig 4, Fig S7 A and B); this was in agreement with the previous report by Fite et al [56]. Light stimuli caused the polarization and deactivation of some GABAergic interneurons, in which the activated level reduced from ~78% to ~57% on GAD positive c-Fos cells (Fig 4 H, \*\*  $P < 0.01$ , Co+Li vs CORT groups; One-way ANOVA with Tukey's multiple comparison test); and also lowered to ~25% from ~55% on c-Fos positive GABA cells (Fig S7 C, \*\*  $P < 0.01$ , Co+Li vs CORT group; One-way ANOVA with Tukey's multiple comparison test). The change of c-Fos expression in the both types of neurons in DRN (Fig 4), implicated the response from GABAergic interneurons was mainly contributed to the light effect from retino-raphé circuitry. This was consistent with that the DRN-projecting retinal fiber was embedded with many puncta of GAD67 positive GABA cells (Fig 5 A-C and Fig S8 A1-A5), rather than that of 5-HT neurons which also co-localized with touched retinal fibers (Fig 5 C and Fig S8 F).

### **5-HT3A coexpressing GABAergic interneurons in DRN mediated the function of light therapy for depression**

The change of c-Fos was further supported by the microstructure of DRN in the rat. The distribution of GAD67 positive GABAergic neurons preferred to be located in both of ventrolateral parts of middle DRN (DRVl) (Fig 5 D and Fig S8 B), whereas the density of 5-HT neurons in DRVl was significantly lower than in the midline DRN (Fig 5 D). In agreement with previous study [21, 23], the retinal fibers from retino-raphé projection also innervated more in the DRVl part of the middle DRN (Fig 5 A and Fig S8 A). In addition, most of 5-HT cells expressed glutamate at the same time (Fig S8 D) [57], then 3 subtypes of GABA neurons could be observed in the rat DRN (Fig 5 and Fig S9), including parvalbumin (PV) positive GABA cells (Fig 5 E and Fig S9 D-G), somatostatin (SOM) positive GABA



---

cells (Fig 5 F and Fig S9 H1-H3), and 5-HT3A positive GABA cells (Fig 5 G-I and Fig S9 A-C). More interestingly, the number of PV positive GABA cells was sparse in DRN and they preferred to locate at two pieces of medial longitudinal fasciculus (mlf) out of DRN (Fig 5 E and S9 D-G); and also the SOM expression was extremely weak in the DRN, even after using TSA amplification kit, only several cells with very weak signal were observed (Fig 5 F and Fig S9 H1-H3). Whereas 5-HT3A positive GABA cells distributed robustly in the whole DRN (Fig 5 G-I and Fig S9 A-C).

Thus we further detected the activation level of 5-HT3A positive GABA cells with the hormone stress and light treatment. The data indicated that 5HT3A positive GABA cells in DRN have been normalized the level of c-Fos expression with the light therapy (Fig 5 J, at II image, a white arrow indicates a c-Fos positive 5HT3A cell while a white arrowhead presents a c-Fos negative 5HT3A cell), which was initially activated by the high intake of stress hormone (Fig 5 J). While in the saporin-injected group the normalization of 5HT3A positive GABA cells was significantly blocked due to the disconnection of retinas and DRN (Fig 5 J,  $P < 0.05$ , Saline vs Saporin groups; One-way ANOVA with Tukey's multiple comparison test). It was implicated that the level of c-Fos expression in 5-HT3A positive GABA cells was most likely to contribute to the light therapy effect through retino-raphé projection.

## Discussion

Depression is a serious mood disorder with a high prevalence and complicated pathophysiology [58, 59]. Currently available antidepressant drugs often had their limitations, like a long time lag for efficacy (several weeks or months), body weight gain and leading to

---

sexual dysfunction [60, 61]. Nevertheless, to our knowledge, light profoundly effected on human mood state and cognitive function [1, 2, 62], and then the light therapy in clinical trials displayed its unique advantageous to treat depression, including fast-onset, low-cost and minor side effect [11]. However, the mechanism underlying them is still not clear so far. The present study revealed that the nerve innervation of retino-raphé projection had a key contribution to the light therapy for this non-seasonal depression model.

Our results at rodent model with corticosterone administration indicated light therapy especially the blue light therapy (200 ~ 400 lux) could effectively reverse the depression-like responses without seasonal pattern. The effect of light therapy was consistent with some clinical reports concerned the efficacy of light therapy, including the effect of light therapy usually needed a week, and the light therapy using blue light was often effective with lower light intensity compared with that using white light [12]. Before this study, several groups have already involved the animal study on light therapy for non-seasonal depression, not only for seasonal depression (SAD) [63, 64]. However, opposite results were obtained about light exposure to rodents [65, 66]. The light parameters and light conditions seemed to be crucial since an aberrant light condition could lead to impairment on mood [67]. This is suggested that it was more likely to benefit from the light therapy conducted in morning with the regular light/dark cycle [68]. A previous study has indicated that light signals could transmit into DRN directly in rats [56], and our previous work in gerbils has also revealed that light signals with photoreceptor ablation using MNU drug mainly driven by OFF alpha cells could modulate 5-HT production and then the related affective behavior through retino-raphé projection [25]. In this study, the blue light therapy was indicated to exhibit better efficacy than the white light therapy. Main reason was because DRN projecting RGCs in rats contained diverse types, at least 72% alpha cells and 10% melanopsin cells (Fig 3 and Fig 4S).

---

Moreover, the rat retinas had been demonstrated to be very sensitive to the blue light (450 nm-495 nm) using their classical photoreceptors and melanopsin photoreceptor together [51]: the rat rods preferred to ~500 nm [50], and the rat cones were most sensitive at either 510 nm or 359 nm [69], whereas the intrinsically photosensitive retinal ganglion cells (ipRGCs, namely, melanopsin cells) in rats were most sensitive at 480 nm [51]. All of photoreceptors had some plain spectrum along their peak photosensitivity; then our using blue LED had the wavelength of  $470 \pm 10$  nm belonged to the relatively much sensitive range of rat retina, which could reasonably activate most of retinal neurons especially with the little ambient white light (~35 lux). The 400 lux blue light therapy (470 nm, 400 lux, 30 min each morning for 7 days) had the best effect of light therapy for non-seasonal depression in this study, almost similar to the efficacy of fluoxetine treatment for 14 days (Fig 1, Fig 2 and Fig S3). So far there was no observational phototoxicity to be found in the retinal neurons following the stimulation of 400 lux blue light, and further evaluation is to conduct.

A recent report indicated that the projection of orexin neurons from the perifornical-lateral hypothalamic area (PF-LHA) into DRN displayed an important pathway in the light therapy, while using the *Arvicanthis niloticus* (Nile grass rat) as a model of seasonal depression with light deprivation [70]. In that case, the most reason might belong to that the grass rat is naturally lack of a direct connection between retinas and DRN region, unlike a distinct retino-raphé projection located at the SD rat [70, 71]. The immunotoxin induced elimination of the retino-raphé projection (lost 80% DRN projecting RGCs) significantly led to the attenuation of the antidepressant effect from the blue light therapy. This clearly revealed that the contribution from retino-raphé projection to the light therapy for those stressed rats. Another alternative argument was that after the retino-raphé projection was specifically eliminated, other retinofugal projections in the brain still probably participated in the light

---

therapy. This could be the retino-SCN projection which was mainly driven by melanospin cells [72]. Since circadian phase shift due to altered light signal input into suprachiasmatic nucleus (SCN) was regarded as a main responsibility for light therapy to seasonal depression [73]. And the effect of circadian phase shift *via* photoentrainment was often taken with an advanced or delayed light stimuli [73, 74]. However, our light therapy conducted in those rats with regular light / dark cycle. Then other retinal projections could not be found to be associated with depression more than the retino-raphe projection. Therefore, our data in this study indicated that the rat retino-raphe projection was a key pathway for the function of light therapy to the non-seasonal depression caused by overdose stress hormone.

As an immediate early gene, *c-fos* with its protein (c-Fos) was often associated with cell depolarization [75, 76]. A dominant pathway for c-Fos induction involved an increased intracellular calcium or an increased levels of cyclic AMP. Previous reports have revealed that with the c-Fos expression, activation of GABAergic interneurons in DRN involved the depression-like responses of rodents [43, 77-79], since GABAergic interneurons in DRN particularly in DRVL part had a vitally inhibitory role in the modulation of 5-HT release in the raphe [14, 43, 80]. According to previous reports that the abundant expression of GR and CRF-2 receptors had been revealed in the DRN [81-83], suggesting that high intake of stress hormone could directly influence the DRN neurons with the hypothalamic–pituitary–adrenal (HPA) axis [83, 84]. Due to the high intake of corticosterone, CRF robustly expressed in DRN (Fig S8 E) and c-Fos was highly induced to express in the GAD67 positive GABA cells (Fig 4 and Fig S7); the inhibition of 5-HT neurons was then triggered (Fig 4 H) following the depressive-like responses happened in those stressed rats (Fig 1, 2 and 6) [31, 85]. When retinal fibers innervated into DRN with the input of light signals, they released glutamate to many types of neighbor cells [86-88], especially 5-HT cells and GABA cells in the DRN (Fig

---

5 and Fig S8). While the GABAergic interneurons received the glutamate from light signals could further communicate with 5-HT neurons probably through their receptors of GABA-A and GABA-B (Fig S10) [89-91]. The 5-HT neurons also might contact with the retinal fibers directly (Fig S8 A) [56]; and the vast majority of 5-HT cells belonged to glutamatergic (Fig S8 D) [57], to effect on neighbor GABAergic interneurons mainly through 5-HT<sub>2A</sub>, 5-HT<sub>2C</sub> as well as 5-HT<sub>3A</sub> receptors (Fig S10) [92-96]. However, c-Fos alteration in this study predominately occurred at GABAergic interneurons rather than 5-HT neurons (Fig 4 and Fig S7), which revealed the important role of GABAergic interneurons in mediating the effect of light therapy through retino-raphé projection. Further indication was that retinal fibers innervation, GABA cells distribution as well as c-Fos expression commonly preferred to exhibit at the DRVL part of middle DRN, where 5-HT neurons distributed relatively low (Fig 5 D and Fig S8 A) [97, 98].

There were mainly three subtypes of GABA cells located in the cortical and subcortical regions [99, 100], including PV positive cells, SOM positive cells as well as 5-HT<sub>3A</sub> positive cells. The 5-HT<sub>3A</sub> receptor, as the only ionotropic serotonergic receptor, had been revealed to express most, if not all, GABAergic interneurons that do not express PV or SOM protein at the mouse cortex [101]. In this study, GABAergic interneurons in the DRN were also found to mostly express 5-HT<sub>3A</sub> receptor (Fig 5 and S9). Compared with 5-HT<sub>3A</sub> positive GABA cells distributed robustly in the whole DRN, the population of PV positive GABA cells was sparse (Fig 5 E and Fig S9 D-G), consistent with the previous study [77]; and the SOM protein was only weakly expressed at a few GABA cells in DRN (Fig 5 F and Fig S9 H1-H) although previous reports had revealed its location in DRN [98, 102]. Thus we further detected the activation level of 5-HT<sub>3A</sub> positive GABA cells with the corticosterone administration and light therapy. Interestingly, it was found that light therapy has normalized

---

the hyperaction of 5-HT<sub>3A</sub> positive GABA cells initially caused by high intake of stress hormone (Fig 5 J). When the retino-raphé projection was eliminated by Saporin treatment prior to light therapy, the normalization of the 5-HT<sub>3A</sub> positive GABA cells was lost, followed by the failure of light therapy to those stressed rats. It was further indicated that the 5-HT<sub>3A</sub> coexpressing GABA cells in the DRN mainly mediated the function of light therapy for non-seasonal depression through retino-raphé projection. Although PV positive GABA cells in DRN was also reported to involve the modulation of depression-like response in other type of rodent models [77], here 5-HT<sub>3A</sub> positive GABA cells were the key contribution to modulate the light therapy effect. In addition, 5-HT<sub>3A</sub> receptor activation and deactivation with c-Fos levels seemed to respectively associate with depression-like and antidepressant-like responses, which was in agreement with the function of 5-HT<sub>3A</sub> agonist and antagonist according to some previous reports [103-105].

In this study, our present data indicated that light therapy had a relatively rapid antidepressant effect at a week, compared with that antidepressant fluoxetine with the function onset after 2 weeks [58, 61]; thus this was less likely to associate with modulation of adult neurogenesis that usually resulted from chronic antidepressant effect [61]. The light stimulation did not significantly induce c-Fos immunoreactivity in the 5-HT neurons, but significantly deactivated the hyperaction of GABAergic interneurons and thus modulated the microcircuitry of DRN serotonergic system. Light suppression of c-Fos expression was also reported previously but the molecular mechanism was not clear so far [56, 106]. C-Fos expression in glutamatergic neurons, like in the retina was usually implicated a maintenance of synaptic connection and signal transmission as well [107, 108], whereas GABAergic interneurons with c-Fos expression would be more likely to contribute an inhibitory function to their neighboring neurons [79, 80, 92, 93]. Before the light signals transmitted into the

---

DRN, many GABAergic interneurons have already stayed in the activation state caused by high level of stress hormone, which was similar to the situation in DRN induced by other types of stress stimuli as well as the state of active sleep (namely, rapid eye movement sleep) [43, 77, 109]. The light signals through retino-raphé projection went into the DRN with the light stimuli and that was very likely to activate the arousal response, since the arousal response was a primary function of the DRN serotonergic system [110, 111]; and the light stimuli could initiate arousal response rapidly [2, 112, 113]. While Saporin immunotoxin specifically eliminated the retino-raphé projection [25], the function of light therapy was significantly blocked. Thus the light therapy for non-seasonal depression is more likely to benefit from the light-induced arousal response in DRN serotonergic system through retino-raphé projection. The function of retino-raphé projection with a natural optogenetics originated from retinal opsins [93, 114, 115], is not only for non-seasonal depression but might also contribute to seasonal depression and other circuitry-related affective disorders due to the intimate connection between raphe and other emotional areas [116-118], and seems to enable most healthy people to benefit from sunshine as well [119, 120]. In future the involved mechanisms on light therapy will be elucidated more thoroughly, which might benefit to understand the depression profoundly and well develop an advanced antidepressant way.

## **Conclusion**

This study indicated the retino-raphé projection had a function to modulate the neural activity in the DRN and contributed to light therapy for a non-seasonal depression model. The light stimulation especially using blue light could reverse the depression-like responses in those stressed rats caused by corticosterone administration. While the retino-raphé projection was largely eliminated using the Saporin immunotoxin, the effect of light therapy was attenuated

---

significantly. During the light therapy for those depressed animals, the light signals through retino-raphé projection deactivated the hyperaction of 5-HT<sub>3A</sub> positive GABA cells with c-Fos expression that initially resulted from high intake of stress hormone; that eventually contributed to antidepressant effect of light therapy.

### **Acknowledgments**

This work was supported by Programme of Introducing Talents of Discipline to Universities (B14036), and Project of International, as well as Hong Kong, Macao & Taiwan Science and Technology Cooperation Innovation Platform in Universities in Guangdong Province (2013gjh0002). This was also supported by grants from the Commission on Innovation and Technology in Shenzhen Municipality of China (JCYJ20150630114942262), the Postdoctoral Science Foundation of China (2015M582440), International Postdoctoral Exchange Fellowship Program 2016 by the Office of China Postdoctoral Council (20160021), and the National Key R&D Program of China (2017YFC1310503).

### **References**

- [1] K.M. Stephenson, C.M. Schroder, G. Bertschy, P. Bourgin, Complex interaction of circadian and non-circadian effects of light on mood: shedding new light on an old story, *Sleep medicine reviews*, 16 (2012) 445-454.
- [2] G. Vandewalle, P. Maquet, D.-J. Dijk, Light as a modulator of cognitive brain function, *Trends in cognitive sciences*, 13 (2009) 429-438.
- [3] G.W. Lambert, C. Reid, D.M. Kaye, G.L. Jennings, M.D. Esler, Effect of sunlight and season on serotonin turnover in the brain, *Lancet*, 360 (2002) 1840-1842.
- [4] N. Praschak-Rieder, M. Willeit, A.A. Wilson, S. Houle, J.H. Meyer, Seasonal variation in human brain serotonin transporter binding, *Archives of general psychiatry*, 65 (2008) 1072-1078.
- [5] A.U. Viola, L.M. James, L.J. Schlangen, D.J. Dijk, Blue-enriched white light in the workplace improves self-reported alertness, performance and sleep quality, *Scandinavian journal of work, environment & health*, 34 (2008) 297-306.



- [6] C. Vetter, M. Juda, D. Lang, A. Wojtysiak, T. Roenneberg, Blue-enriched office light competes with natural light as a zeitgeber, *Scandinavian journal of work, environment & health*, 37 (2011) 437-445.
- [7] M. Terman, J.S. Terman, D.C. Ross, A controlled trial of timed bright light and negative air ionization for treatment of winter depression, *Archives of general psychiatry*, 55 (1998) 875-882.
- [8] R. Lieveerse, E.J. Van Someren, M.M. Nielen, B.M. Uitdehaag, J.H. Smit, W.J. Hoogendijk, Bright light treatment in elderly patients with nonseasonal major depressive disorder: a randomized placebo-controlled trial, *Archives of general psychiatry*, 68 (2011) 61-70.
- [9] H. Niederhofer, K. von Klitzing, Bright light treatment as mono-therapy of non-seasonal depression for 28 adolescents, *International journal of psychiatry in clinical practice*, 16 (2012) 233-237.
- [10] D. Kripke, Light treatment for nonseasonal depression: speed, efficacy, and combined treatment, *Journal of affective disorders*, 49 (1998) 109-117.
- [11] A. Wirz-Justice, M. Terman, D.A. Oren, F.K. Goodwin, D.F. Kripke, P.C. Whybrow, K.L. Wisner, J.C. Wu, R.W. Lam, M. Berger, K.V. Danilenko, S. Kasper, E. Smeraldi, K. Takahashi, C. Thompson, R.H. van den Hoofdakker, Brightening depression, *Science*, 303 (2004) 467-469.
- [12] G. Pail, W. Huf, E. Pjrek, D. Winkler, M. Willeit, N. Praschak-Rieder, S. Kasper, Bright-light therapy in the treatment of mood disorders, *Neuropsychobiology*, 64 (2011) 152-162.
- [13] K.A. Michelsen, C. Schmitz, H.W. Steinbusch, The dorsal raphe nucleus—from silver stainings to a role in depression, *Brain research reviews*, 55 (2007) 329-342.
- [14] A.J. Jasinska, C.A. Lowry, M. Burmeister, Serotonin transporter gene, stress and raphe-raphe interactions: a molecular mechanism of depression, *Trends Neurosci*, 35 (2012) 395-402.
- [15] J.P. Jacobsen, I.O. Medvedev, M.G. Caron, The 5-HT deficiency theory of depression: perspectives from a naturalistic 5-HT deficiency model, the tryptophan hydroxylase 2Arg439His knockin mouse, *Philosophical transactions of the Royal Society of London. Series B, Biological sciences*, 367 (2012) 2444-2459.
- [16] N. Araragi, K.P. Lesch, Serotonin (5-HT) in the regulation of depression-related emotionality: insight from 5-HT transporter and tryptophan hydroxylase-2 knockout mouse models, *Curr Drug Targets*, 14 (2013) 549-570.
- [17] X. Zhang, R.R. Gainetdinov, J.M. Beaulieu, T.D. Sotnikova, L.H. Burch, R.B. Williams, D.A. Schwartz, K.R. Krishnan, M.G. Caron, Loss-of-function mutation in tryptophan hydroxylase-2 identified in unipolar major depression, *Neuron*, 45 (2005) 11-16.
- [18] J.P. Jacobsen, W.B. Siesser, B.D. Sachs, S. Peterson, M.J. Cools, V. Setola, J.H. Folgering, G. Flik, M.G. Caron, Deficient serotonin neurotransmission and depression-like serotonin biomarker alterations in tryptophan hydroxylase 2 (Tph2) loss-of-function mice, *Molecular psychiatry*, 17 (2012) 694-704.
- [19] R. Frazao, L. Pinato, A.V. da Silva, L.R. Britto, J.A. Oliveira, M.I. Nogueira, Evidence of reciprocal connections between the dorsal raphe nucleus and the retina in the monkey *Cebus apella*, *Neuroscience letters*, 430 (2008) 119-123.
- [20] L. Luan, C. Ren, B.W. Lau, J. Yang, G.E. Pickard, K.F. So, M. Pu, Y-like retinal ganglion cells innervate the dorsal raphe nucleus in the Mongolian gerbil (*Meriones unguiculatus*), *PLoS one*, 6 (2011) e18938.
- [21] K.V. Fite, S. Janusonis, W. Foote, L. Bengston, Retinal afferents to the dorsal raphe nucleus in rats and Mongolian gerbils, *The Journal of comparative neurology*, 414 (1999) 469-484.
- [22] W.E. Foote, E. Taber-Pierce, L. Edwards, Evidence for a retinal projection to the midbrain raphe of the cat, *Brain research*, 156 (1978) 135-140.
- [23] H. Shen, K. Semba, A direct retinal projection to the dorsal raphe nucleus in the rat, *Brain research*, 635 (1994) 159-168.

- [24] G. Vandewalle, C. Schmidt, G. Albouy, V. Sterpenich, A. Darsaud, G. Rauchs, P.Y. Berken, E. Baiteau, C. Degueldre, A. Luxen, P. Maquet, D.J. Dijk, Brain responses to violet, blue, and green monochromatic light exposures in humans: prominent role of blue light and the brainstem, *PloS one*, 2 (2007) e1247.
- [25] C. Ren, L. Luan, B. Wui-Man Lau, X. Huang, J. Yang, Y. Zhou, X. Wu, J. Gao, G.E. Pickard, K.F. So, M. Pu, Direct retino-raphé projection alters serotonergic tone and affective behavior, *Neuropsychopharmacology : official publication of the American College of Neuropsychopharmacology*, 38 (2013) 1163-1175.
- [26] D.J. David, B.A. Samuels, Q. Rainer, J.W. Wang, D. Marsteller, I. Mendez, M. Drew, D.A. Craig, B.P. Guiard, J.P. Guilloux, R.P. Artymyshyn, A.M. Gardier, C. Gerald, I.A. Antonijevic, E.D. Leonardo, R. Hen, Neurogenesis-dependent and -independent effects of fluoxetine in an animal model of anxiety/depression, *Neuron*, 62 (2009) 479-493.
- [27] S.L. Gourley, F.J. Wu, D.D. Kiraly, J.E. Ploski, A.T. Kedves, R.S. Duman, J.R. Taylor, Regionally specific regulation of ERK MAP kinase in a model of antidepressant-sensitive chronic depression, *Biological psychiatry*, 63 (2008) 353-359.
- [28] S.A. Johnson, N.M. Fournier, L.E. Kalynchuk, Effect of different doses of corticosterone on depression-like behavior and HPA axis responses to a novel stressor, *Behavioural brain research*, 168 (2006) 280-288.
- [29] G.J. Huang, J. Herbert, Serotonin modulates the suppressive effects of corticosterone on proliferating progenitor cells in the dentate gyrus of the hippocampus in the adult rat, *Neuropsychopharmacology : official publication of the American College of Neuropsychopharmacology*, 30 (2005) 231-241.
- [30] S.-Y. Yau, A. Li, E.-D. Zhang, B.R. Christie, A. Xu, T.M.C. Lee, K.-F. So, Sustained Running in Rats Administered Corticosterone Prevents the Development of Depressive Behaviors and Enhances Hippocampal Neurogenesis and Synaptic Plasticity Without Increasing Neurotrophic Factor Levels, *Cell transplantation*, 23 (2014) 481-492.
- [31] L.G. Kirby, E. Freeman-Daniels, J.C. Lemos, J.D. Nunan, C. Lamy, A. Akanwa, S.G. Beck, Corticotropin-releasing factor increases GABA synaptic activity and induces inward current in 5-hydroxytryptamine dorsal raphe neurons, *The Journal of neuroscience : the official journal of the Society for Neuroscience*, 28 (2008) 12927-12937.
- [32] N.A. Datson, N. Speksnijder, J.L. Mayer, P.J. Steenbergen, O. Korobko, J. Goeman, E.R. de Kloet, M. Joels, P.J. Lucassen, The transcriptional response to chronic stress and glucocorticoid receptor blockade in the hippocampal dentate gyrus, *Hippocampus*, 22 (2012) 359-371.
- [33] <1996-GR distribution in raphe.pdf>.
- [34] S.Y. Yau, B.W. Lau, E.D. Zhang, J.C. Lee, A. Li, T.M. Lee, Y.P. Ching, A.M. Xu, K.F. So, Effects of voluntary running on plasma levels of neurotrophins, hippocampal cell proliferation and learning and memory in stressed rats, *Neuroscience*, 222 (2012) 289-301.
- [35] S.Y. Yau, B.W. Lau, J.B. Tong, R. Wong, Y.P. Ching, G. Qiu, S.W. Tang, T.M. Lee, K.F. So, Hippocampal neurogenesis and dendritic plasticity support running-improved spatial learning and depression-like behaviour in stressed rats, *PloS one*, 6 (2011) e24263.
- [36] J.J. Rutter, C. Gundlach, S.B. Auerbach, Increase in extracellular serotonin produced by uptake inhibitors is enhanced after chronic treatment with fluoxetine, *Neuroscience letters*, 171 (1994) 183-186.
- [37] G. Lucas, V.V. Rymar, J. Du, O. Mnie-Filali, C. Bisgaard, S. Manta, L. Lambas-Senas, O. Wiborg, N. Haddjeri, G. Piñeyro, A.F. Sadikot, G. Debonnel, Serotonin<sub>4</sub> (5-HT<sub>4</sub>) Receptor Agonists Are Putative Antidepressants with a Rapid Onset of Action, *Neuron*, 55 (2007) 712-725.
- [38] D.A. Slattery, J.F. Cryan, Using the rat forced swim test to assess antidepressant-like activity in rodents, *Nat. Protocols*, 7 (2012) 1009-1014.

- [39] J.S. Snyder, A. Soumier, M. Brewer, J. Pickel, H.A. Cameron, Adult hippocampal neurogenesis buffers stress responses and depressive behaviour, *Nature*, 476 (2011) 458-461.
- [40] A. Gregus, A.J. Wintink, A.C. Davis, L.E. Kalynchuk, Effect of repeated corticosterone injections and restraint stress on anxiety and depression-like behavior in male rats, *Behavioural brain research*, 156 (2005) 105-114.
- [41] J.A. Bouwknecht, F. Spiga, D.R. Staub, M.W. Hale, A. Shekhar, C.A. Lowry, Differential effects of exposure to low-light or high-light open-field on anxiety-related behaviors: relationship to c-Fos expression in serotonergic and non-serotonergic neurons in the dorsal raphe nucleus, *Brain Res Bull*, 72 (2007) 32-43.
- [42] B. Lin, A. Koizumi, N. Tanaka, S. Panda, R.H. Masland, Restoration of visual function in retinal degeneration mice by ectopic expression of melanopsin, *Proceedings of the National Academy of Sciences of the United States of America*, 105 (2008) 16009-16014.
- [43] M. Roche, K.G. Commons, A. Peoples, R.J. Valentino, Circuitry underlying regulation of the serotonergic system by swim stress, *The Journal of neuroscience*, 23 (2003) 970-977.
- [44] M.W. Hale, A. Hay-Schmidt, J.D. Mikkelsen, B. Poulsen, J.A. Bouwknecht, A.K. Evans, C. Stamper, A. Shekhar, C. Lowry, Exposure to an open-field arena increases c-Fos expression in a subpopulation of neurons in the dorsal raphe nucleus, including neurons projecting to the basolateral amygdaloid complex, *Neuroscience*, 157 (2008) 733-748.
- [45] W. Fu, E. Le Maître, V. Fabre, J.F. Bernard, Z.Q. David Xu, T. Hökfelt, Chemical neuroanatomy of the dorsal raphe nucleus and adjacent structures of the mouse brain, *Journal of Comparative Neurology*, 518 (2010) 3464-3494.
- [46] E.D. Paul, M.W. Hale, J.L. Lukkes, M.J. Valentine, D.M. Sarchet, C.A. Lowry, Repeated social defeat increases reactive emotional coping behavior and alters functional responses in serotonergic neurons in the rat dorsal raphe nucleus, *Physiology & behavior*, 104 (2011) 272-282.
- [47] G. Paxinos, C.R.R. Watson, P.C. Emsen, Ache-Stained Horizontal Sections of the Rat-Brain in Stereotaxic Coordinates, *Journal of neuroscience methods*, 3 (1980) 129-149.
- [48] J.K. Abrams, P.L. Johnson, J.H. Hollis, C.A. Lowry, Anatomic and functional topography of the dorsal raphe nucleus, *Annals of the New York Academy of Sciences*, 1018 (2004) 46-57.
- [49] S.L. Gourley, J.R. Taylor, Recapitulation and reversal of a persistent depression-like syndrome in rodents, *Current protocols in neuroscience / editorial board*, Jacqueline N. Crawley ... [et al.], Chapter 9 (2009) Unit 9.32.
- [50] C.D. Bridges, Visual pigments of some common laboratory mammals, *Nature*, 184(Suppl 22) (1959) 1727-1728.
- [51] D.M. Berson, Strange vision: ganglion cells as circadian photoreceptors, *Trends Neurosci*, 26 (2003) 314-320.
- [52] E.S. Ingham, E. Gunhan, P.M. Fuller, C.A. Fuller, Immunotoxin-induced ablation of melanopsin retinal ganglion cells in a non-murine mammalian model, *The Journal of comparative neurology*, 516 (2009) 125-140.
- [53] P. Sassone-Corsi, J. Visvader, L. Ferland, P.L. Mellon, I.M. Verma, Induction of proto-oncogene fos transcription through the adenylate cyclase pathway: characterization of a cAMP-responsive element, *Genes & development*, 2 (1988) 1529-1538.
- [54] M. Sheng, G. McFadden, M.E. Greenberg, Membrane depolarization and calcium induce c-fos transcription via phosphorylation of transcription factor CREB, *Neuron*, 4 (1990) 571-582.
- [55] M.J. Detke, M. Rickels, I. Lucki, Active behaviors in the rat forced swimming test differentially produced by serotonergic and noradrenergic antidepressants, *Psychopharmacology*, 121 (1995) 66-72.
- [56] K.V. Fite, P.S. Wu, A. Bellemer, Photostimulation alters c-Fos expression in the dorsal raphe nucleus, *Brain research*, 1031 (2005) 245-252.

- [57] Z. Liu, J. Zhou, Y. Li, F. Hu, Y. Lu, M. Ma, Q. Feng, J.E. Zhang, D. Wang, J. Zeng, J. Bao, J.Y. Kim, Z.F. Chen, S. El Mestikawy, M. Luo, Dorsal raphe neurons signal reward through 5-HT and glutamate, *Neuron*, 81 (2014) 1360-1374.
- [58] R.H. Belmaker, G. Agam, Major depressive disorder, *The New England journal of medicine*, 358 (2008) 55-68.
- [59] V. Krishnan, E.J. Nestler, The molecular neurobiology of depression, *Nature*, 455 (2008) 894-902.
- [60] P.S. Masand, S. Gupta, Long-term side effects of newer-generation antidepressants: SSRIS, venlafaxine, nefazodone, bupropion, and mirtazapine, *Ann Clin Psychiatry*, 14 (2002) 175-182.
- [61] R.S. Duman, B. Voleti, Signaling pathways underlying the pathophysiology and treatment of depression: novel mechanisms for rapid-acting agents, *Trends Neurosci*, 35 (2012) 47-56.
- [62] T. Partonen, J. Lonnqvist, Effects of light on mood, *Ann Med*, 25 (1993) 301-302.
- [63] O. Iyilikci, E. Aydin, R. Canbeyli, Blue but not red light stimulation in the dark has antidepressant effect in behavioral despair, *Behav Brain Res*, 203 (2009) 65-68.
- [64] J.J. Dimatelis, D.J. Stein, V.A. Russell, Behavioral changes after maternal separation are reversed by chronic constant light treatment, *Brain research*, 1480 (2012) 61-71.
- [65] T.A. Bedrosian, R.J. Nelson, Influence of the modern light environment on mood, *Molecular psychiatry*, 18 (2013) 751-757.
- [66] T.A. Bedrosian, L.K. Fonken, J.C. Walton, A. Haim, R.J. Nelson, Dim light at night provokes depression-like behaviors and reduces CA1 dendritic spine density in female hamsters, *Psychoneuroendocrinology*, 36 (2011) 1062-1069.
- [67] T.A. LeGates, C.M. Altimus, H. Wang, H.K. Lee, S. Yang, H. Zhao, A. Kirkwood, E.T. Weber, S. Hattar, Aberrant light directly impairs mood and learning through melanopsin-expressing neurons, *Nature*, 491 (2012) 594-598.
- [68] K. Krivisky, H. Einat, N. Kronfeld-Schor, Effects of morning compared with evening bright light administration to ameliorate short-photoperiod induced depression- and anxiety-like behaviors in a diurnal rodent model, *Journal of neural transmission (Vienna, Austria : 1996)*, 119 (2012) 1241-1248.
- [69] G.H. Jacobs, J.A. Fenwick, G.A. Williams, Cone-based vision of rats for ultraviolet and visible lights, *The Journal of experimental biology*, 204 (2001) 2439-2446.
- [70] W. Adidharma, G. Leach, L. Yan, Orexinergic signaling mediates light-induced neuronal activation in the dorsal raphe nucleus, *Neuroscience*, 220 (2012) 201-207.
- [71] F. Gaillard, H.J. Karten, Y. Sauve, Retinorecipient areas in the diurnal murine rodent *Arvicanthis niloticus*: A disproportionately large superior colliculus, *The Journal of comparative neurology*, 521 (2013) Spc1.
- [72] G.E. Pickard, P.J. Sollars, Intrinsically photosensitive retinal ganglion cells, *Reviews of physiology, biochemistry and pharmacology*, 162 (2012) 59-90.
- [73] P.J. Sollars, A.M. Simpson, M.D. Ogilvie, G.E. Pickard, Light-induced Fos expression is attenuated in the suprachiasmatic nucleus of serotonin 1B receptor knockout mice, *Neuroscience letters*, 401 (2006) 209-213.
- [74] G.E. Pickard, F.W. Turek, Splitting of the circadian rhythm of activity is abolished by unilateral lesions of the suprachiasmatic nuclei, *Science*, 215 (1982) 1119-1121.
- [75] G.E. Hoffman, D. Lyo, Anatomical Markers of Activity in Neuroendocrine Systems: Are we all 'Fos-ed out?', *Journal of Neuroendocrinology*, 14 (2002) 259-268.
- [76] K. Yoshida, K. Kawamura, J. Imaki, Differential expression of c-fos mRNA in rat retinal cells: regulation by light/dark cycle, *Neuron*, 10 (1993) 1049-1054.
- [77] S.K. Tan, M.L. Janssen, A. Jahanshahi, L. Chouliaras, V. Visser-Vandewalle, L.W. Lim, H.W. Steinbusch, T. Sharp, Y. Temel, High frequency stimulation of the subthalamic nucleus increases c-fos immunoreactivity in the dorsal raphe nucleus and afferent brain regions, *Journal of psychiatric research*, 45 (2011) 1307-1315.

- [78] Y. Ishida, H. Hashiguchi, R. Takeda, Y. Ishizuka, Y. Mitsuyama, H. Kannan, T. Nishimori, D. Nakahara, Conditioned-fear stress increases Fos expression in monoaminergic and GABAergic neurons of the locus coeruleus and dorsal raphe nuclei, *Synapse (New York, N.Y.)*, 45 (2002) 46-51.
- [79] C. Challis, J. Boulden, A. Veerakumar, J. Espallergues, F.M. Vassoler, R.C. Pierce, S.G. Beck, O. Berton, Raphe GABAergic neurons mediate the acquisition of avoidance after social defeat, *The Journal of neuroscience : the official journal of the Society for Neuroscience*, 33 (2013) 13978-13988, 13988a.
- [80] C. Challis, S.G. Beck, O. Berton, Optogenetic modulation of descending prefrontocortical inputs to the dorsal raphe bidirectionally bias socioaffective choices after social defeat, *Frontiers in behavioral neuroscience*, 8 (2014) 43.
- [81] M. Morimoto, N. Morita, H. Ozawa, K. Yokoyama, M. Kawata, Distribution of glucocorticoid receptor immunoreactivity and mRNA in the rat brain: an immunohistochemical and in situ hybridization study, *Neuroscience research*, 26 (1996) 235-269.
- [82] H.E. Day, B.N. Greenwood, S.E. Hammack, L.R. Watkins, M. Fleshner, S.F. Maier, S. Campeau, Differential expression of 5HT-1A, alpha 1b adrenergic, CRF-R1, and CRF-R2 receptor mRNA in serotonergic, gamma-aminobutyric acidergic, and catecholaminergic cells of the rat dorsal raphe nucleus, *The Journal of comparative neurology*, 474 (2004) 364-378.
- [83] M.Y. Vincent, L. Jacobson, Glucocorticoid receptor deletion from the dorsal raphe nucleus of mice reduces dysphoria-like behavior and impairs hypothalamic-pituitary-adrenocortical axis feedback inhibition, *The European journal of neuroscience*, 39 (2014) 1671-1681.
- [84] N.C. Donner, C.D. Montoya, J.L. Lukkes, C.A. Lowry, Chronic non-invasive corticosterone administration abolishes the diurnal pattern of tph2 expression, *Psychoneuroendocrinology*, 37 (2012) 645-661.
- [85] S.F. Maier, L.R. Watkins, Stressor controllability and learned helplessness: the roles of the dorsal raphe nucleus, serotonin, and corticotropin-releasing factor, *Neuroscience and biobehavioral reviews*, 29 (2005) 829-841.
- [86] C. Guo, S.L. Stella, Jr., A.A. Hirano, N.C. Brecha, Plasmalemmal and vesicular gamma-aminobutyric acid transporter expression in the developing mouse retina, *The Journal of comparative neurology*, 512 (2009) 6-26.
- [87] M.A. Belenky, N. Sagiv, J.M. Fritschy, Y. Yarom, Presynaptic and postsynaptic GABAA receptors in rat suprachiasmatic nucleus, *Neuroscience*, 118 (2003) 909-923.
- [88] M. Castel, M. Belenky, S. Cohen, O.P. Ottersen, J. Storm-Mathisen, Glutamate-like immunoreactivity in retinal terminals of the mouse suprachiasmatic nucleus, *The European journal of neuroscience*, 5 (1993) 368-381.
- [89] M. Harandi, M. Aguera, H. Gamrani, M. Didier, M. Maitre, A. Calas, M.F. Belin, gamma-Aminobutyric acid and 5-hydroxytryptamine interrelationship in the rat nucleus raphe dorsalis: combination of radioautographic and immunocytochemical techniques at light and electron microscopy levels, *Neuroscience*, 21 (1987) 237-251.
- [90] Q.P. Wang, H. Ochiai, Y. Nakai, GABAergic innervation of serotonergic neurons in the dorsal raphe nucleus of the rat studied by electron microscopy double immunostaining, *Brain Res Bull*, 29 (1992) 943-948.
- [91] H. Mohler, The GABA system in anxiety and depression and its therapeutic potential, *Neuropharmacology*, 62 (2012) 42-53.
- [92] P. Queree, S. Peters, T. Sharp, Further pharmacological characterization of 5-HT(2C) receptor agonist-induced inhibition of 5-HT neuronal activity in the dorsal raphe nucleus in vivo, *British journal of pharmacology*, 158 (2009) 1477-1485.
- [93] K. Spoida, O.A. Masseck, E.S. Deneris, S. Herlitze, Gq/5-HT2c receptor signals activate a local GABAergic inhibitory feedback circuit to modulate serotonergic firing and anxiety in mice, *Proceedings of the National Academy of Sciences of the United States of America*, 111 (2014) 6479-6484.

- [94] I. Ferezou, B. Cauli, E.L. Hill, J. Rossier, E. Hamel, B. Lambolez, 5-HT<sub>3</sub> receptors mediate serotonergic fast synaptic excitation of neocortical vasoactive intestinal peptide/cholecystokinin interneurons, *The Journal of neuroscience : the official journal of the Society for Neuroscience*, 22 (2002) 7389-7397.
- [95] M. Morales, C. Backman, Coexistence of serotonin 3 (5-HT<sub>3</sub>) and CB1 cannabinoid receptors in interneurons of hippocampus and dentate gyrus, *Hippocampus*, 12 (2002) 756-764.
- [96] <2005-A role of GABA activation in 5-HT feedback control-Neuroreport Sharp.pdf>.
- [97] L.H. Calizo, A. Akanwa, X. Ma, Y.Z. Pan, J.C. Lemos, C. Craige, L.A. Heemstra, S.G. Beck, Raphe serotonin neurons are not homogenous: electrophysiological, morphological and neurochemical evidence, *Neuropharmacology*, 61 (2011) 524-543.
- [98] W. Fu, E. Le Maitre, V. Fabre, J.F. Bernard, Z.Q. David Xu, T. Hokfelt, Chemical neuroanatomy of the dorsal raphe nucleus and adjacent structures of the mouse brain, *The Journal of comparative neurology*, 518 (2010) 3464-3494.
- [99] B. Rudy, G. Fishell, S. Lee, J. Hjerling-Leffler, Three groups of interneurons account for nearly 100% of neocortical GABAergic neurons, *Developmental neurobiology*, 71 (2011) 45-61.
- [100] F. Mascagni, A.J. McDonald, A novel subpopulation of 5-HT type 3A receptor subunit immunoreactive interneurons in the rat basolateral amygdala, *Neuroscience*, 144 (2007) 1015-1024.
- [101] S. Lee, J. Hjerling-Leffler, E. Zagha, G. Fishell, B. Rudy, The largest group of superficial neocortical GABAergic interneurons expresses ionotropic serotonin receptors, *The Journal of neuroscience : the official journal of the Society for Neuroscience*, 30 (2010) 16796-16808.
- [102] <1999-SOM colabels 5-HT cells in DRN.pdf>.
- [103] T. Kos, P. Popik, M. Pietraszek, D. Schafer, W. Danysz, O. Dravolina, E. Blokhina, T. Galankin, A.Y. Beshpalov, Effect of 5-HT<sub>3</sub> receptor antagonist MDL 72222 on behaviors induced by ketamine in rats and mice, *European neuropsychopharmacology : the journal of the European College of Neuropsychopharmacology*, 16 (2006) 297-310.
- [104] F. Artigas, Serotonin receptors involved in antidepressant effects, *Pharmacology & therapeutics*, 137 (2013) 119-131.
- [105] Y. Nakagawa, T. Ishima, T. Takashima, The 5-HT<sub>3</sub> receptor agonist attenuates the action of antidepressants in the forced swim test in rats, *Brain research*, 786 (1998) 189-193.
- [106] C. Beaulieu, A. Arvanitogiannis, S. Amir, Light suppresses Fos expression in the shell region of the suprachiasmatic nucleus at dusk and dawn: implications for photic entrainment of circadian rhythms, *Neuroscience*, 106 (2001) 249-254.
- [107] A. Poveda, R. Kretz, c-Fos expression in the visual system of the tree shrew (*Tupaia belangeri*), *Journal of chemical neuroanatomy*, 37 (2009) 214-228.
- [108] K. Yoshida, K. Kawamura, J. Imaki, Differential expression of c-fos mRNA in rat retinal cells: Regulation by light/dark cycle, *Neuron*, 10 (1993) 1049-1054.
- [109] J.M. Monti, The role of dorsal raphe nucleus serotonergic and non-serotonergic neurons, and of their receptors, in regulating waking and rapid eye movement (REM) sleep, *Sleep medicine reviews*, 14 (2010) 319-327.
- [110] L.E. Rueter, C.A. Fornal, B.L. Jacobs, A critical review of 5-HT brain microdialysis and behavior, *Reviews in the neurosciences*, 8 (1997) 117-137.
- [111] L. Ferraro, K. Fuxe, L. Agnati, S. Tanganelli, M.C. Tomasini, T. Antonelli, Modafinil enhances the increase of extracellular serotonin levels induced by the antidepressant drugs fluoxetine and imipramine: a dual probe microdialysis study in awake rat, *Synapse (New York, N.Y.)*, 55 (2005) 230-241.
- [112] K.M. Stephenson, C.M. Schroder, G. Bertschy, P. Bourgin, Complex interaction of circadian and non-circadian effects of light on mood: Shedding new light on an old story, *Sleep medicine reviews*, 16 (2012) 445-454.
- [113] C. Cajochen, Alerting effects of light, *Sleep medicine reviews*, 11 (2007) 453-464.

- 
- [114] X. Li, D.V. Gutierrez, M.G. Hanson, J. Han, M.D. Mark, H. Chiel, P. Hegemann, L.T. Landmesser, S. Herlitze, Fast noninvasive activation and inhibition of neural and network activity by vertebrate rhodopsin and green algae channelrhodopsin, *Proceedings of the National Academy of Sciences of the United States of America*, 102 (2005) 17816-17821.
- [115] O.A. Masseck, K. Spoida, D. Dalkara, T. Maejima, J.M. Rubelowski, L. Wallhorn, E.S. Deneris, S. Herlitze, Vertebrate cone opsins enable sustained and highly sensitive rapid control of Gi/o signaling in anxiety circuitry, *Neuron*, 81 (2014) 1263-1273.
- [116] G.E. Pickard, M.A. Rea, Serotonergic innervation of the hypothalamic suprachiasmatic nucleus and photic regulation of circadian rhythms, *Biology of the cell / under the auspices of the European Cell Biology Organization*, 89 (1997) 513-523.
- [117] M.W. Hale, A. Shekhar, C.A. Lowry, Stress-related serotonergic systems: implications for symptomatology of anxiety and affective disorders, *Cellular and molecular neurobiology*, 32 (2012) 695-708.
- [118] M. Terman, Evolving applications of light therapy, *Sleep medicine reviews*, 11 (2007) 497-507.
- [119] N. Schwarz, G.L. Clore, Mood, misattribution, and judgments of well-being: Informative and directive functions of affective states, *Journal of personality and social psychology*, 45 (1983) 513.
- [120] S. Kämpfer, M. Mutz, On the Sunny Side of Life: Sunshine Effects on Life Satisfaction, *Soc Indic Res*, 110 (2013) 579-595.

## Legends

**Figure 1 Light stimuli reversed the depressive behavior of stressed rats.** (A) Immobility time of those stressed rats during FST. (B) Sucrose preference test of those stressed rats. (C) Blue light therapy at 100 lux, 200 lux and 400 lux. (D) White light therapy at 100 lux, 200 lux and 400 lux. (E) 400 lux light therapy compared with fluoxetine treatment. Note that the blue light therapy had better efficacy than the white light therapy at 400 lux, with similar to fluoxetine treatment. \* $P < 0.05$ , \*\*  $P < 0.01$ , \*\*\* $p < 0.001$  vs. CORT group,  $n=6$ . Oil-ctrl: oil injected control group; CORT: corticosterone injected group; Blue-100, Blue-200 and Blue-400: light treated groups using blue light with 100 lux, 200 lux and 400 lux, respectively; White-100, White-200 and White-400: light treated groups using white light with 100 lux, 200 lux and 400 lux, respectively. Flx: corticosterone injection with fluoxetine treatment for 14 days.

**Figure 2 Eliminated retino-raphé projection diminished antidepressant effect of light therapy to stressed rats.** (A) Forced swim test, (B) Sucrose preference test and (C) Open field test. Oil-ctrl: oil injection group,  $n=18$ ; CORT: corticosterone injection group,  $n=24$ ; Saline: CTB injection with saline injection, followed by corticosterone injection and blue light therapy (400 lux),  $n=8$ ; Saporin: CTB injection with saporin injection, followed by corticosterone injection and blue light therapy (400 lux),  $n=8$ ; Flx: corticosterone injection with fluoxetine treatment,  $n=6$ . \*  $P < 0.05$ , \*\*  $P < 0.01$ , \*\*\* $p < 0.001$  vs. CORT group.

**Figure 3 Saporin injection eliminated DRN projecting RGCs specifically.** (A) is CTB injected site located at central DRN, (B) is CTB labelling cells on flat mounted retina and (C) is a CTB positive cell with intracellular injection. (D) indicates a distribution of CTB positive cells at saline-injected group (734 cells) while (E) is the saporin-injected group (79 cells). Note that (F) the number of DRN-projecting RGCs in the saporin injected group was significantly reduced compared with that in saline injected group. \*\*\*  $P < 0.001$ ,  $n=6$ .

**Figure 4 Altered expression of c-Fos in DRN with corticosterone administration and light therapy.** Images (A) and (C) show the co-staining of c-Fos and TPH. Images (B) and (D & D') indicate the co-stain of c-Fos and GAD-67 in DRN. Black arrows in (C) and (D') show the c-Fos positive cells, while the black arrowhead at (C)



indicates c-Fos co-labelling TPH cell; and the white arrowhead at (D) and (D') indicates GAD-67 positive cell whereas the white arrows show the c-Fos co-labelling GAD-67 cells. Scar bars: A and B, 50  $\mu\text{m}$ ; C, D and D', 10  $\mu\text{m}$ . The bar graphs from (E)-(G) represent the change of c-Fos expression and (H) indicates the change of TPH positive cells by means  $\pm$  SEM (n=6). Note that the different expression of c-Fos significantly occurred at GAD-67 positive GABA cells. \*P < 0.05, \*\* P < 0.01, \*\*\*p<0.001 vs CORT group. Oil-ctrl: oil injected control group; CORT: corticosterone injected group; CO+Li: corticosterone injected with light treated group.

**Figure 5 The hyperaction of 5-HT3A positive GABA cells was normalized by Light therapy.** (A-C) indicate the triple labelling including CTB positive retinal fibers, GAD-67 positive GABA puncta and 5-HT positive cells. (D) GAD-67 positive GABA cells and their punta preferred to locate at the lateral parts of DRN (DRVl). (E & E') and (F) The subtypes of GABA cells, parvalbumin (PV) positive GABA cells and somatostatin (SOM) positive GABA cells. Also the 5-HT3A positive GABA cells (G-I). Note that 5-HT3A positive cells, rather than PV cells and SOM cells, predominated the GABA expression in the DRN. The hyper activation of 5-HT3A positive GABA cells with c-Fos expression was induced by CORT administration, while it was normalized by light therapy in saline group (J). \*P < 0.05 vs. CORT group, n=6. (I)-(II) presents the co-stain of 5-HT3A and c-Fos at (J). The black arrow indicates a c-Fos positive cell; and the white arrow indicates a c-Fos co-labelling 5HT3A positive cell whereas the white arrowhead shows the c-Fos negative 5HT3A positive cell. Oil-ctrl: oil injected control group; CORT: corticosterone injected group; CO+Li: corticosterone injected with light treated group. Scar bars: A-C, 5  $\mu\text{m}$ ; D, 50  $\mu\text{m}$ ; E-I, 20  $\mu\text{m}$ ; I, 20  $\mu\text{m}$ ; II, 10  $\mu\text{m}$ .

**Figure 1**

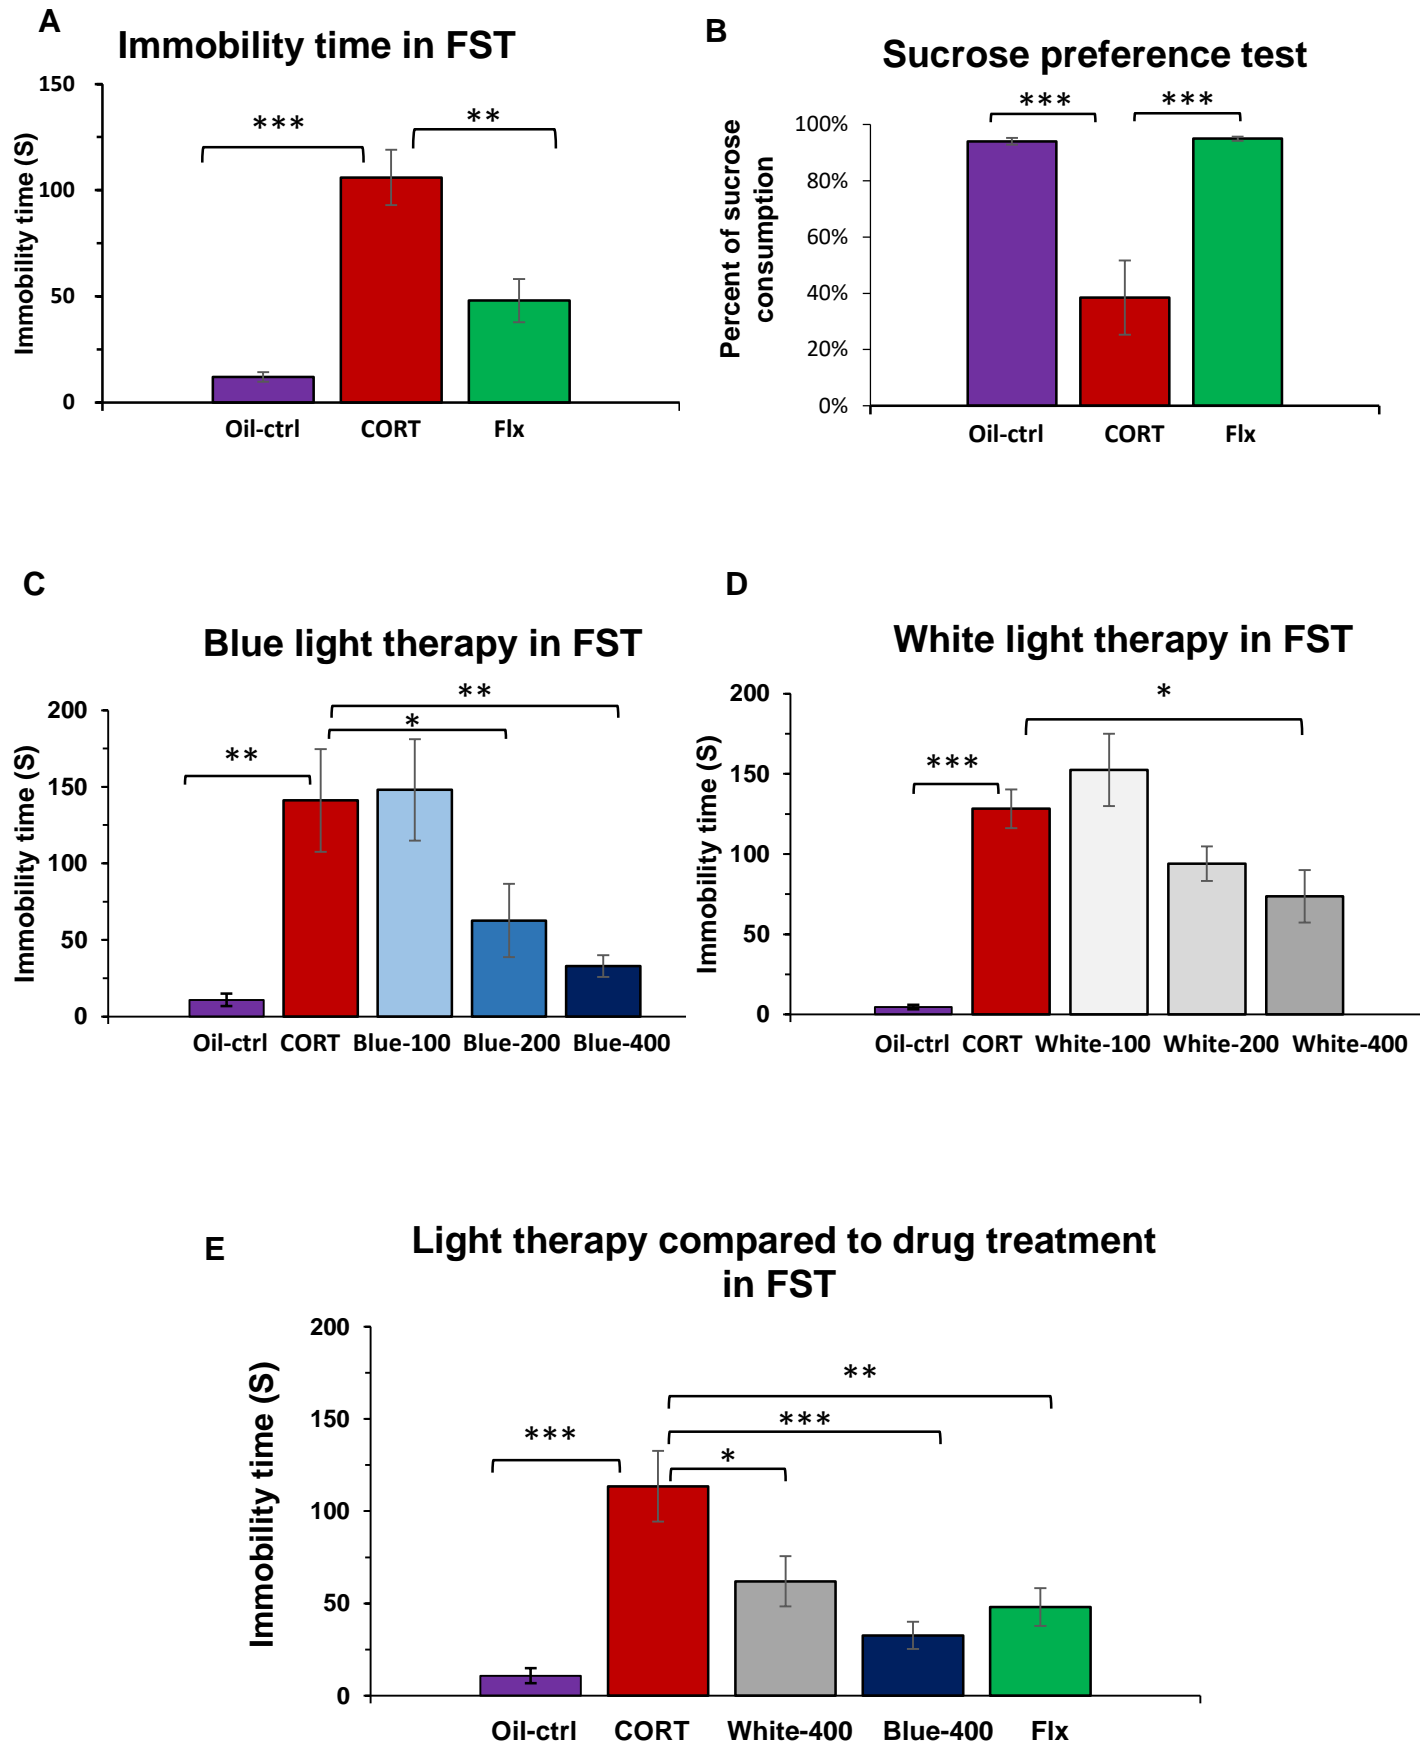

**Figure 2**

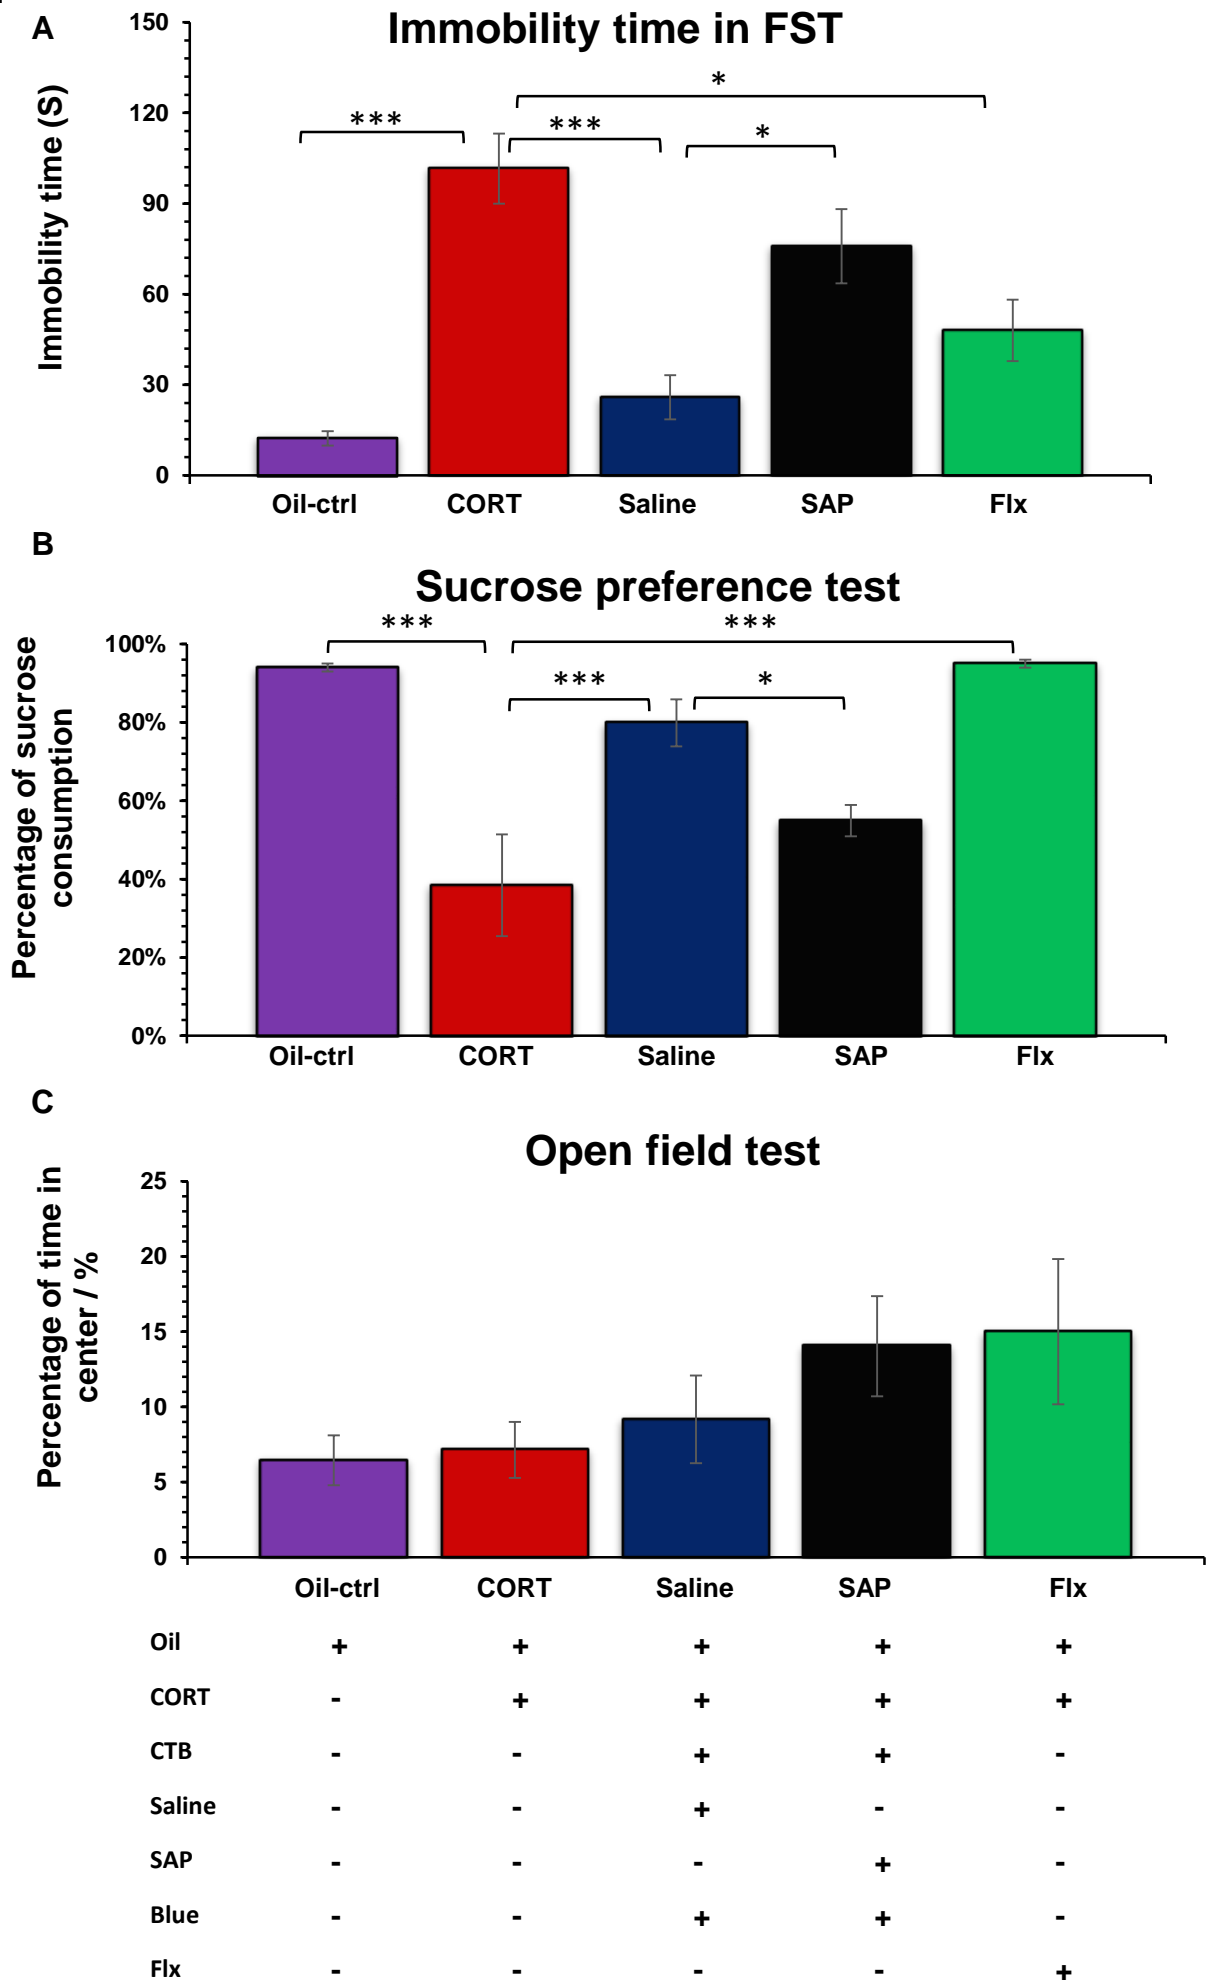

**Figure 3**

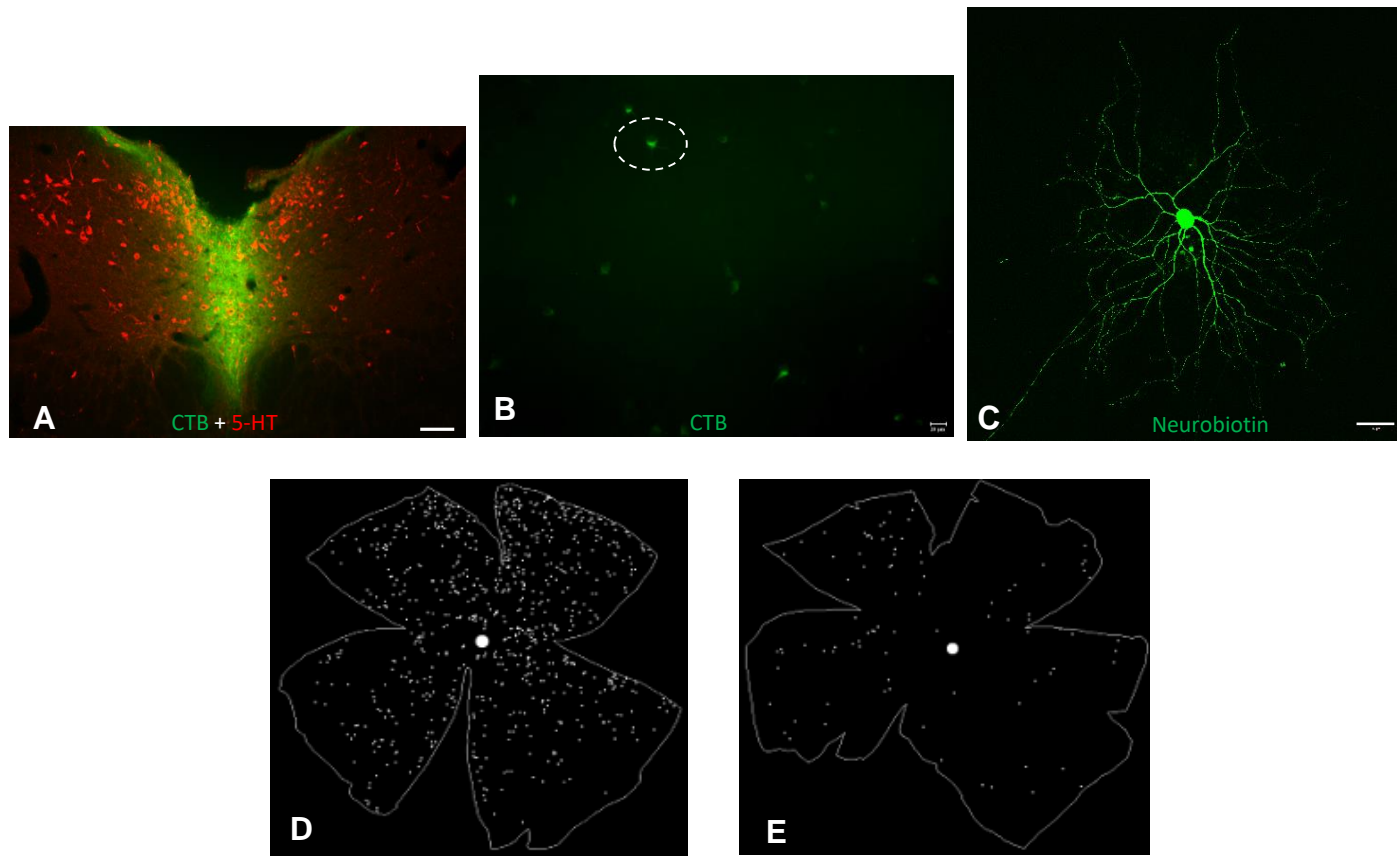

**F Saporin treatment to eliminate DRN projecting RGCs**

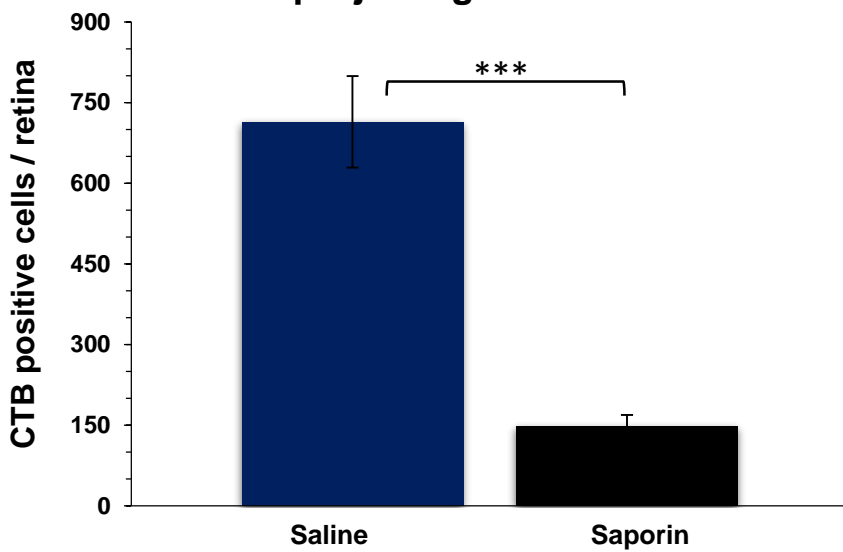

## Figure 4

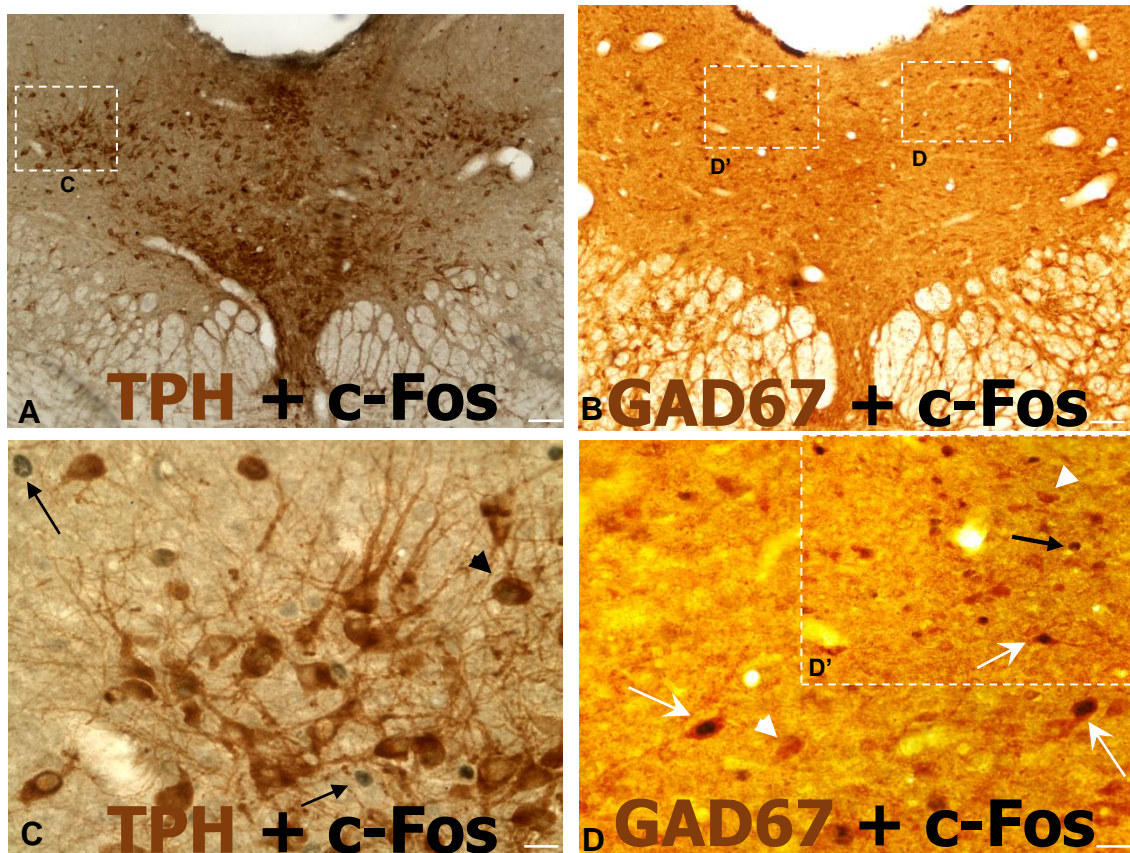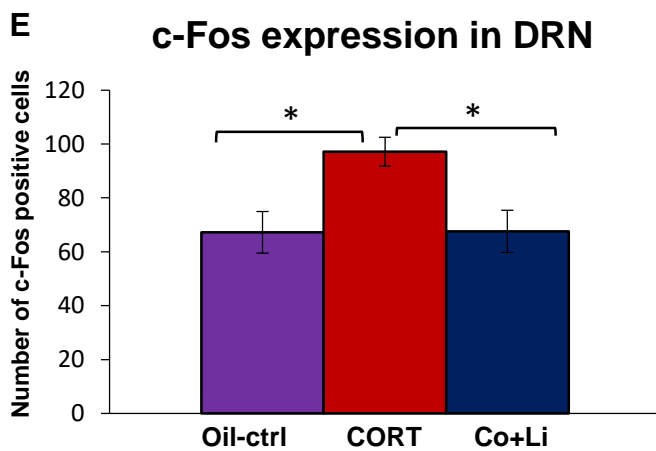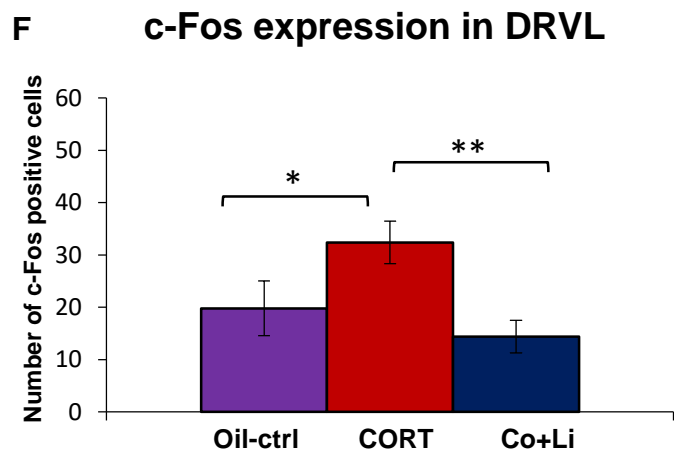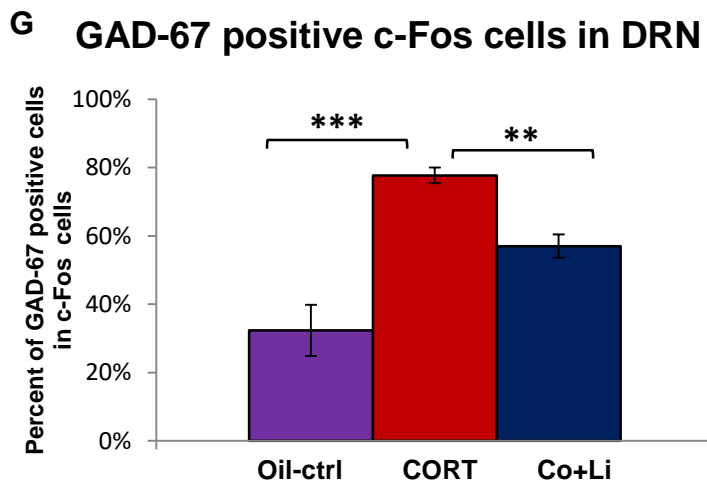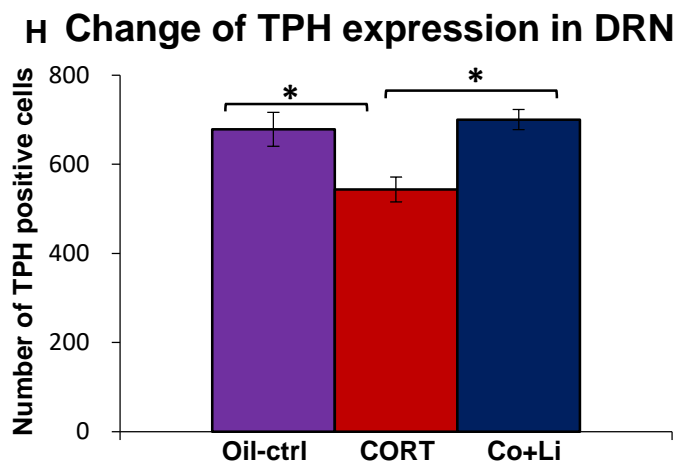

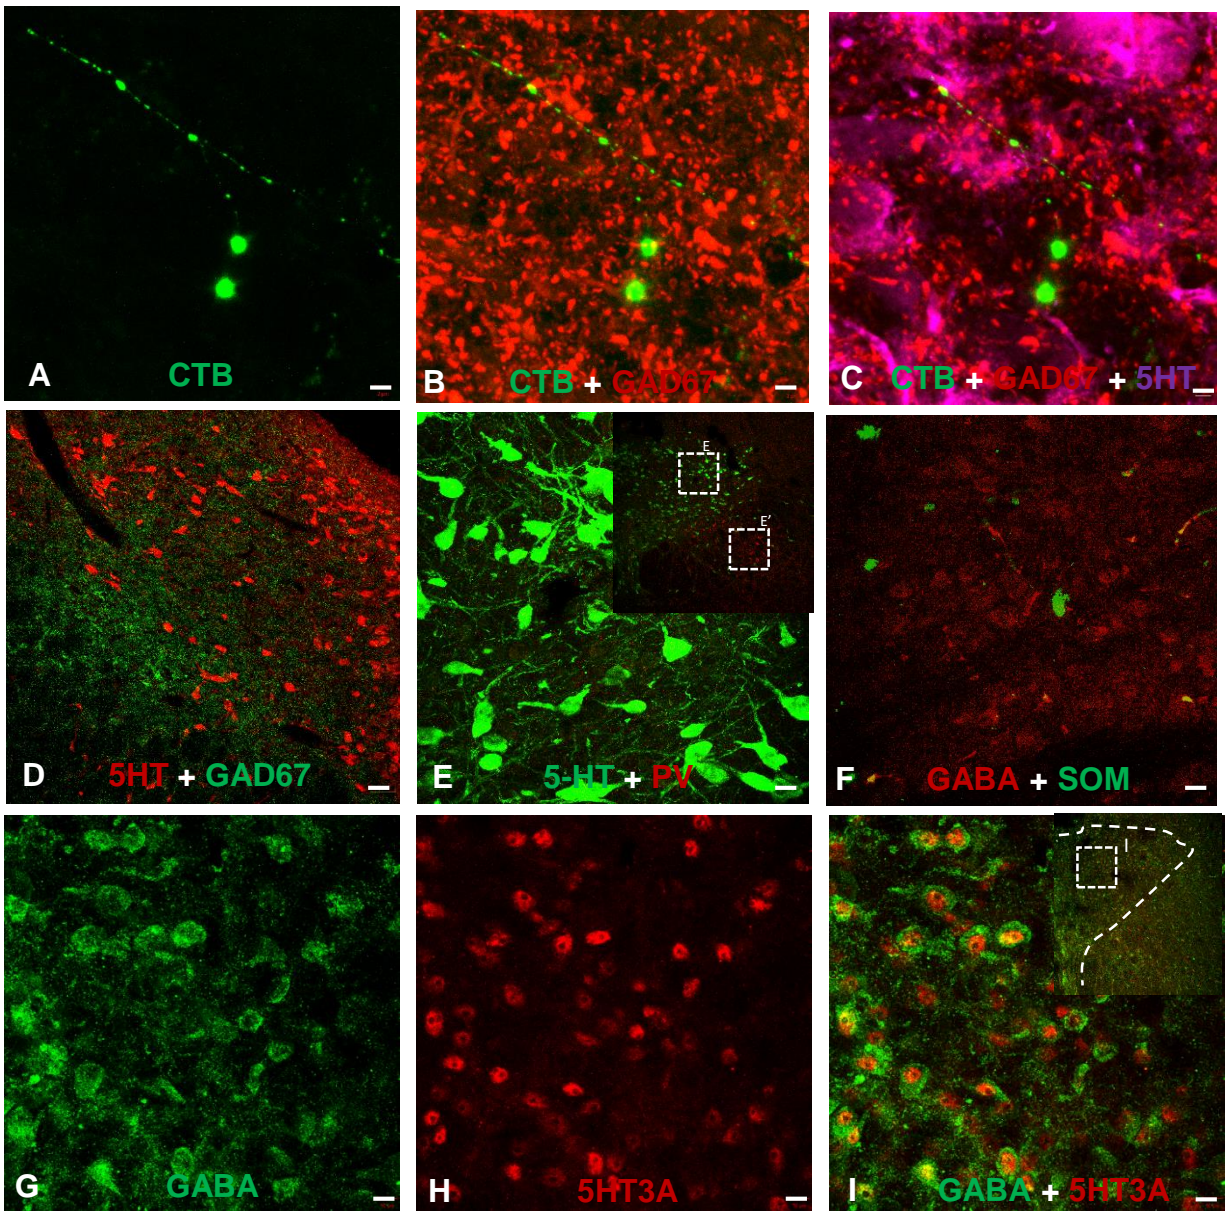

**c-Fos positive 5HT3A/GABA cells in DRN**

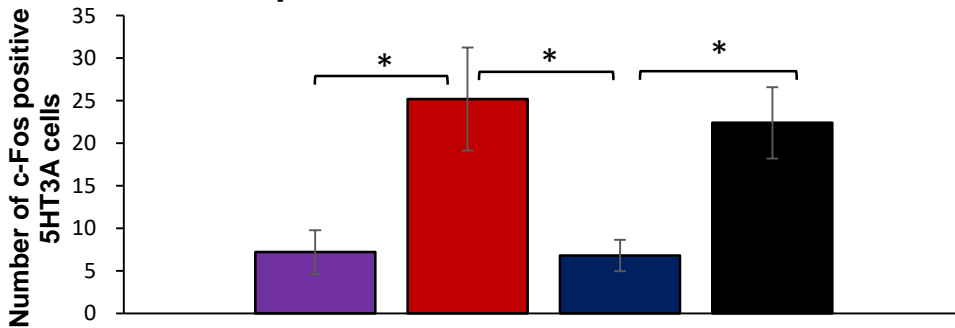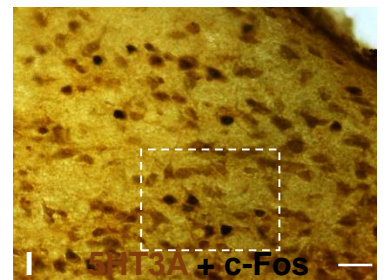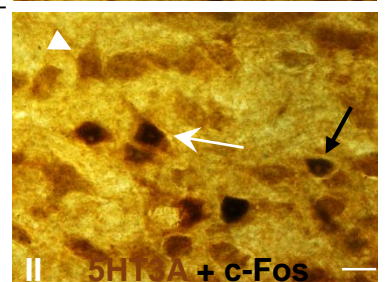

|        | Oil-ctrl | CORT | Saline | SAP |
|--------|----------|------|--------|-----|
| Oil    | +        | +    | +      | +   |
| CORT   | -        | +    | +      | +   |
| CTB    | -        | -    | +      | +   |
| Saline | -        | -    | +      | -   |
| SAP    | -        | -    | -      | +   |
| Blue   | -        | -    | +      | +   |
