# Supplementary material for: Light stimulation into dorsal raphe nucleus contributes to antidepressant effect for a stressed rat model
Source: bioRxiv or medRxiv preprint supplement (doi:10.1101/821421), 2019-10-29

# Figure S1

**A**

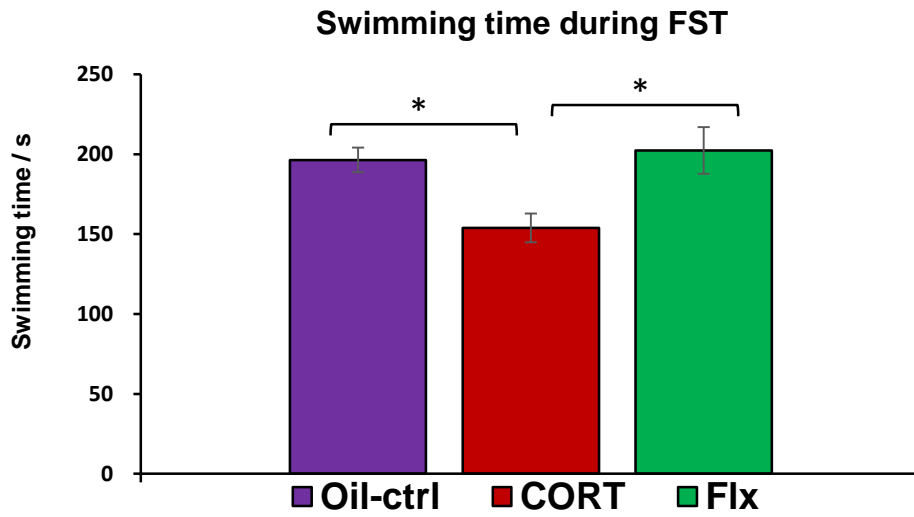

**B**

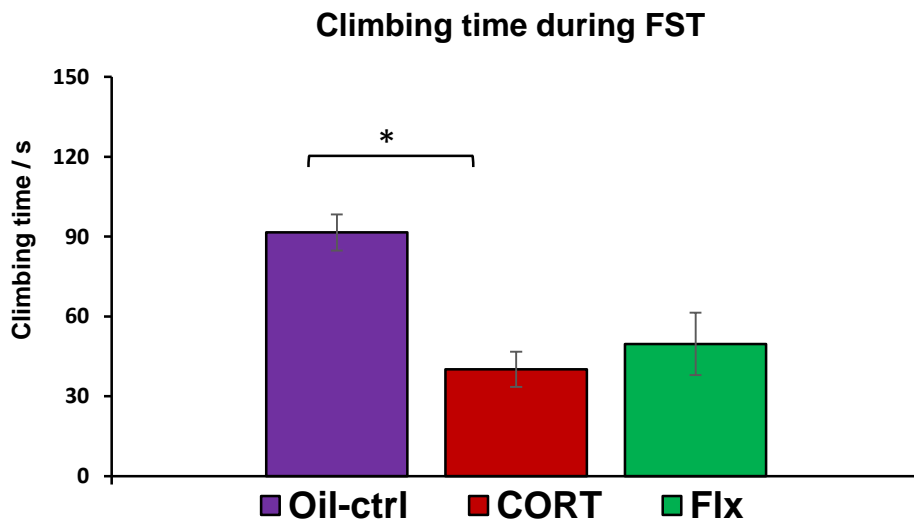

# Figure S1

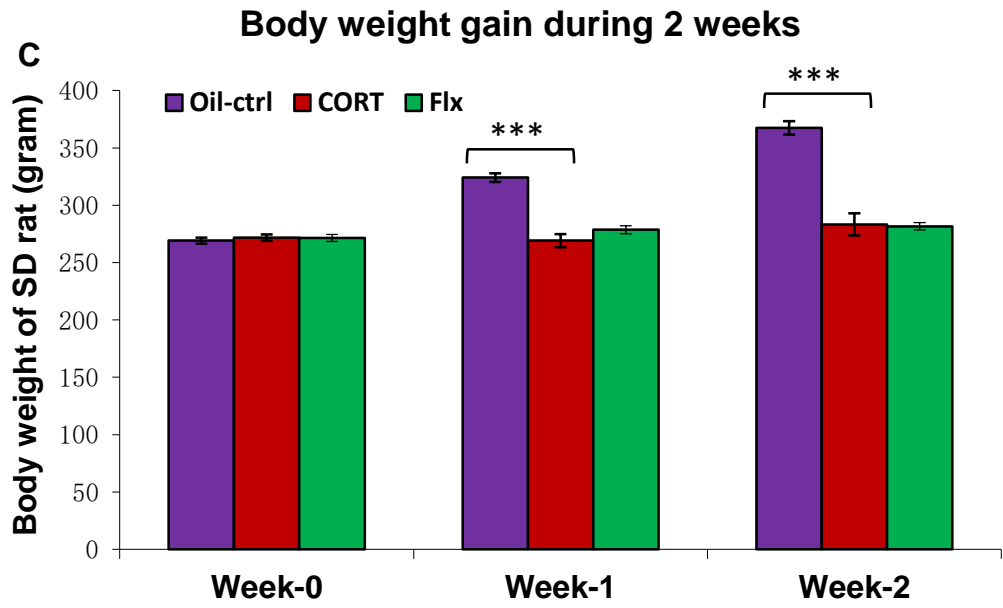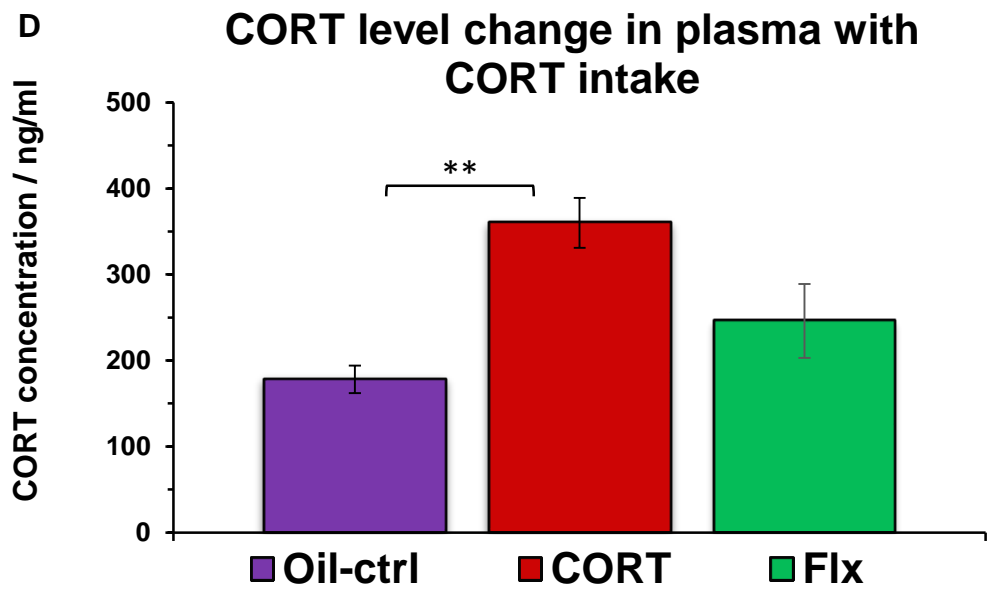

Figure S2

A

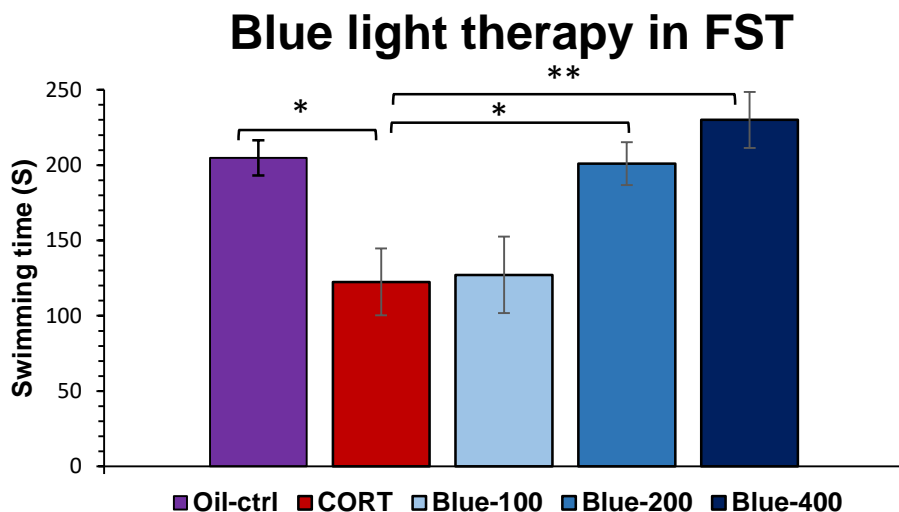

B

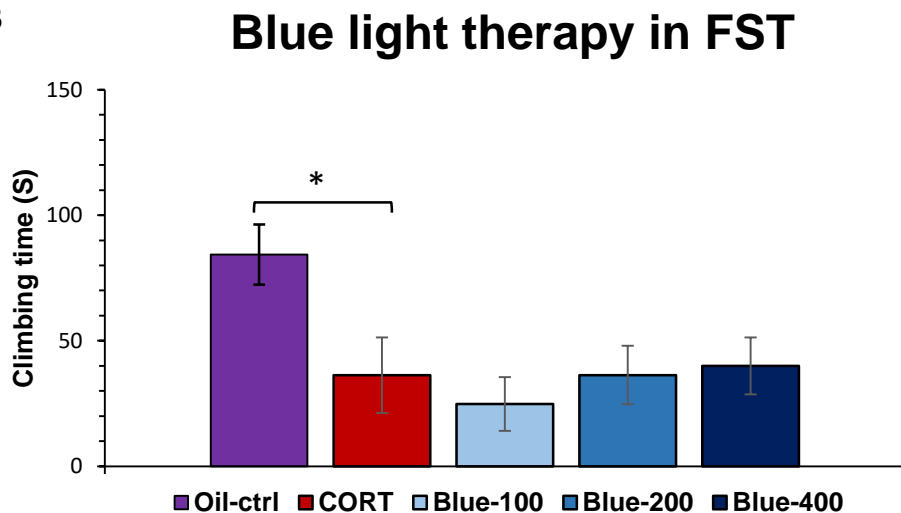

C

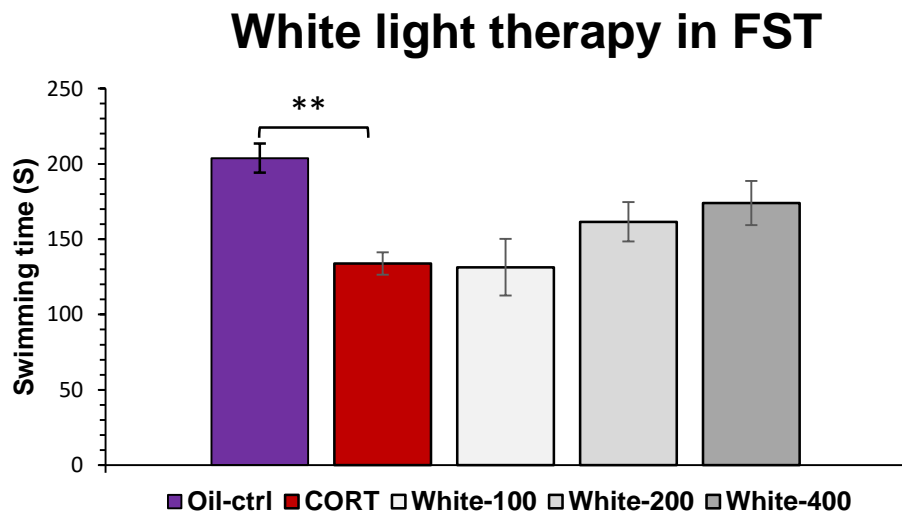

Figure S2

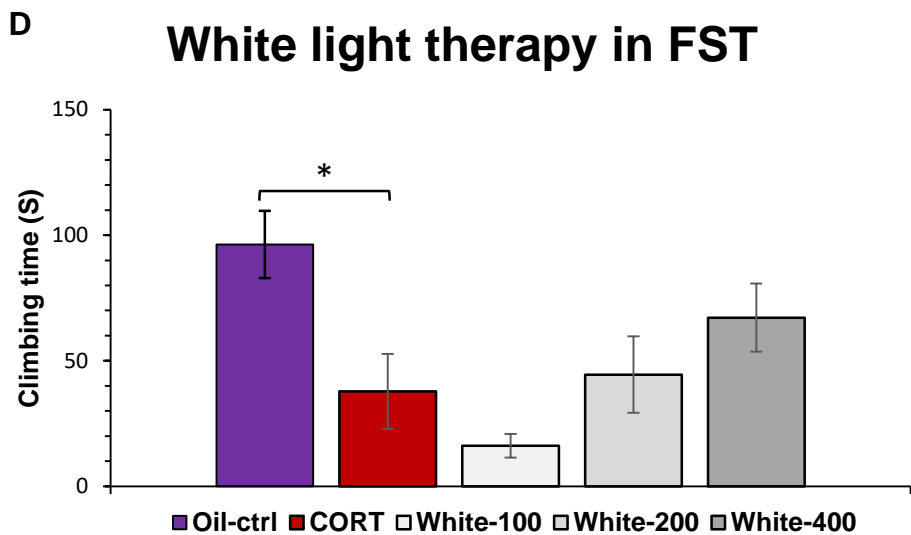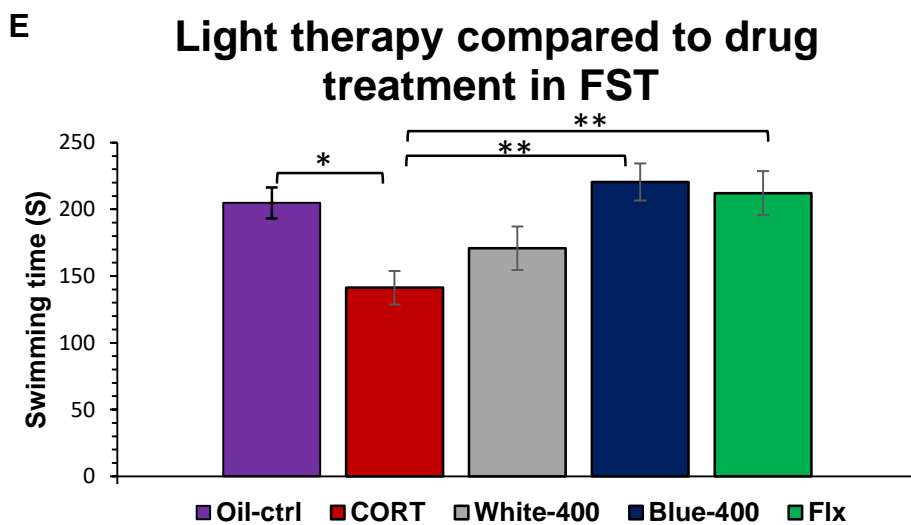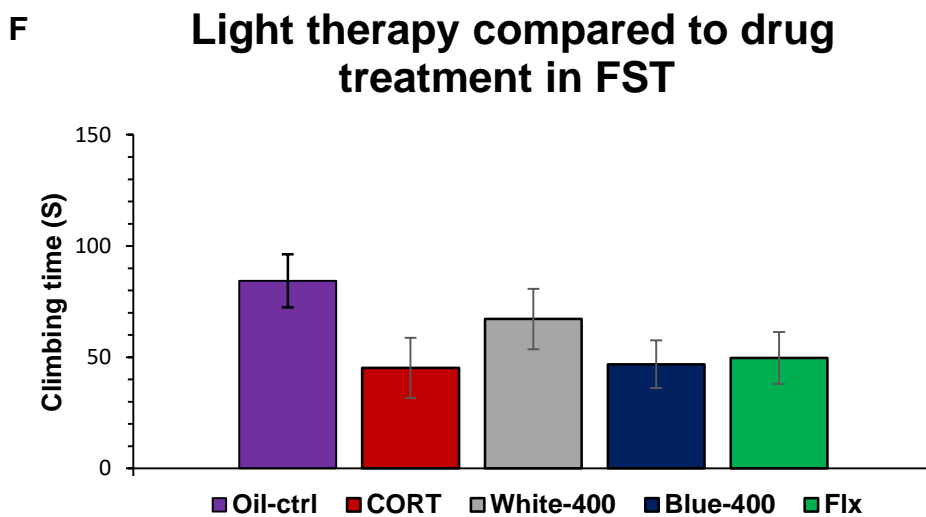

Figure S2

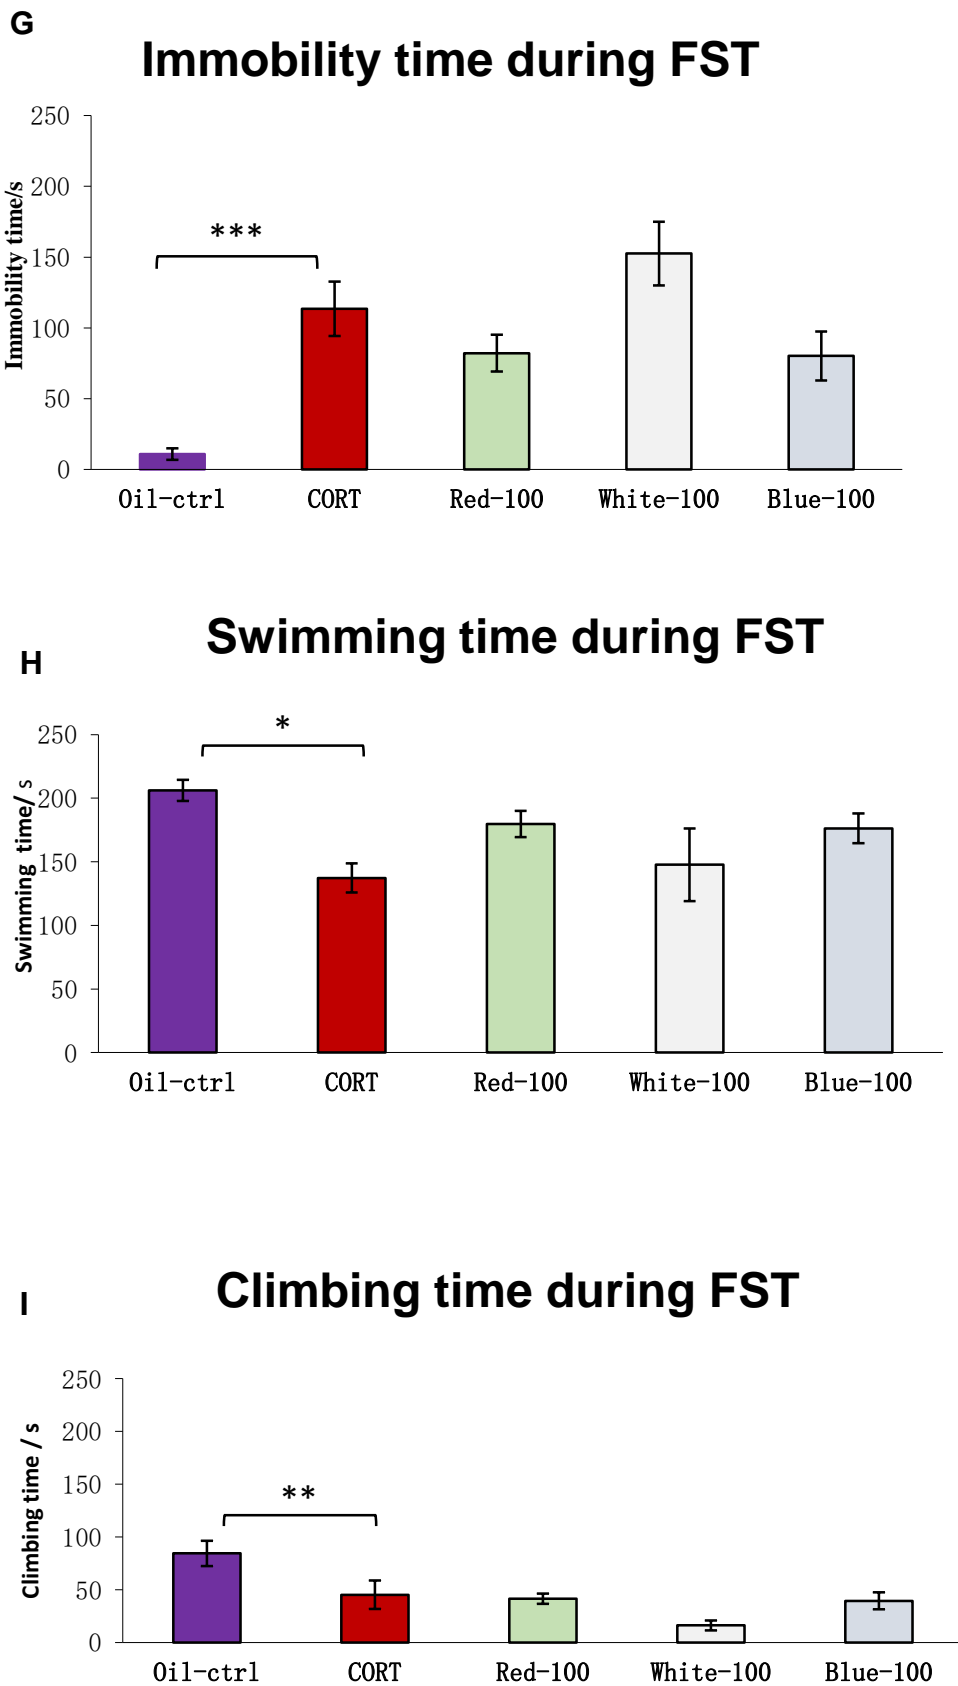

# Figure S3

A

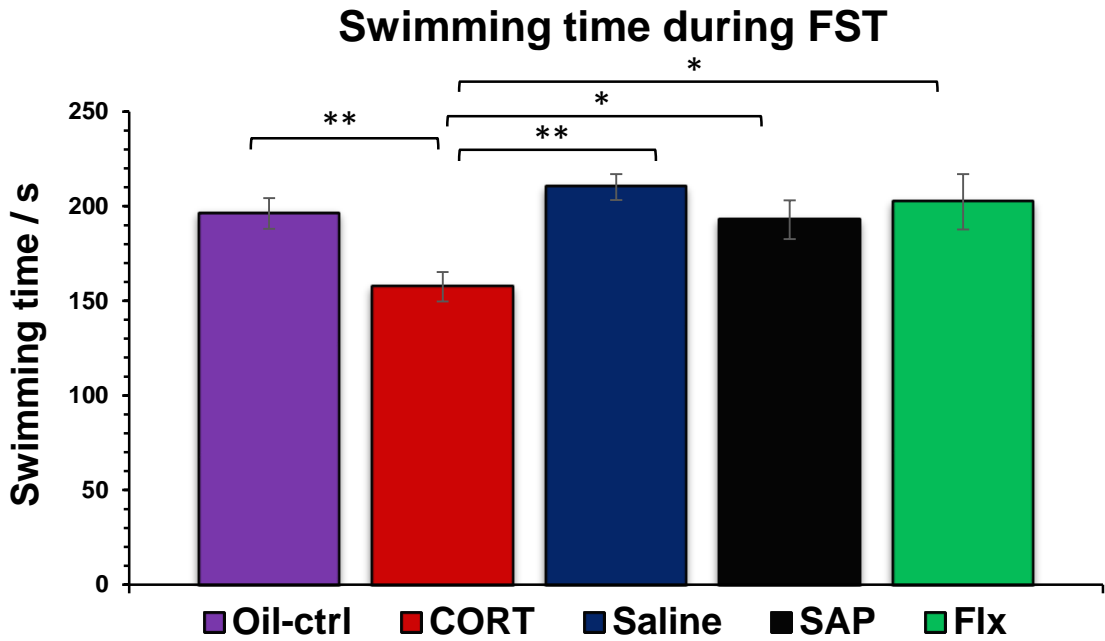

B

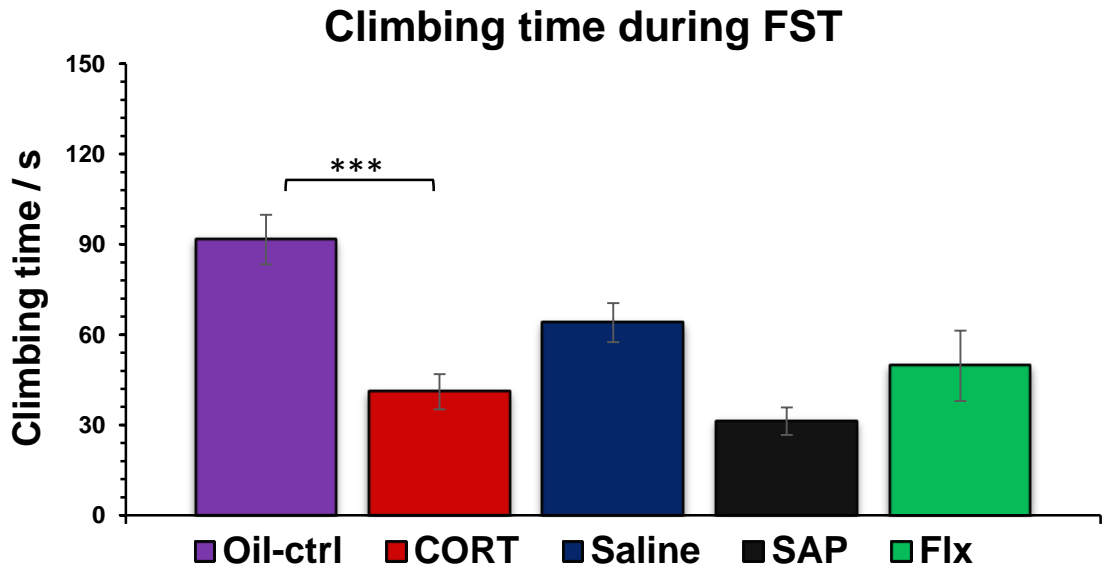

C

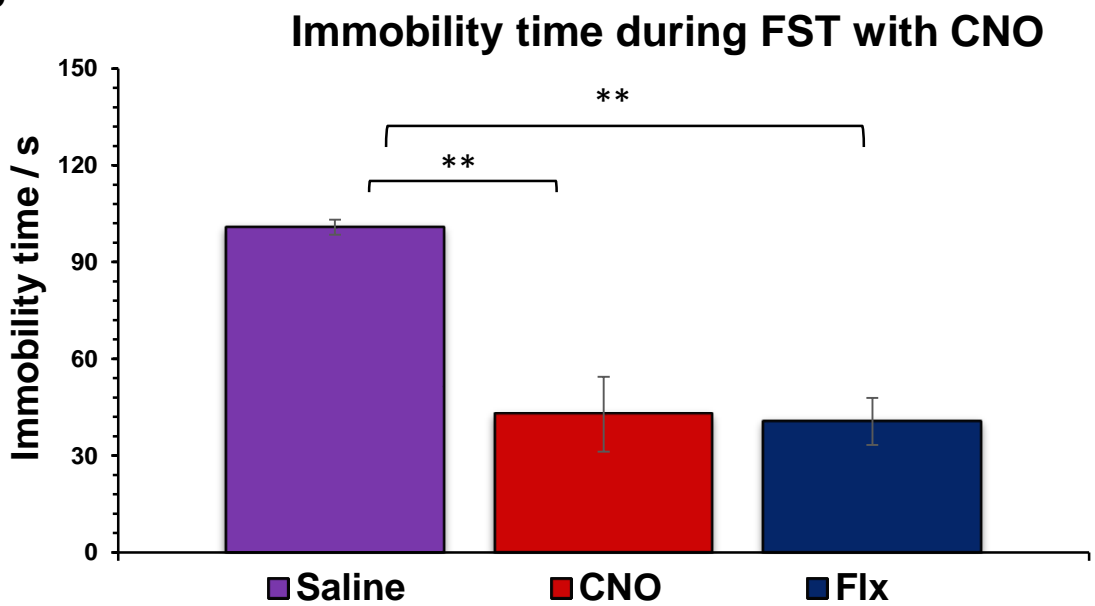

Figure S4

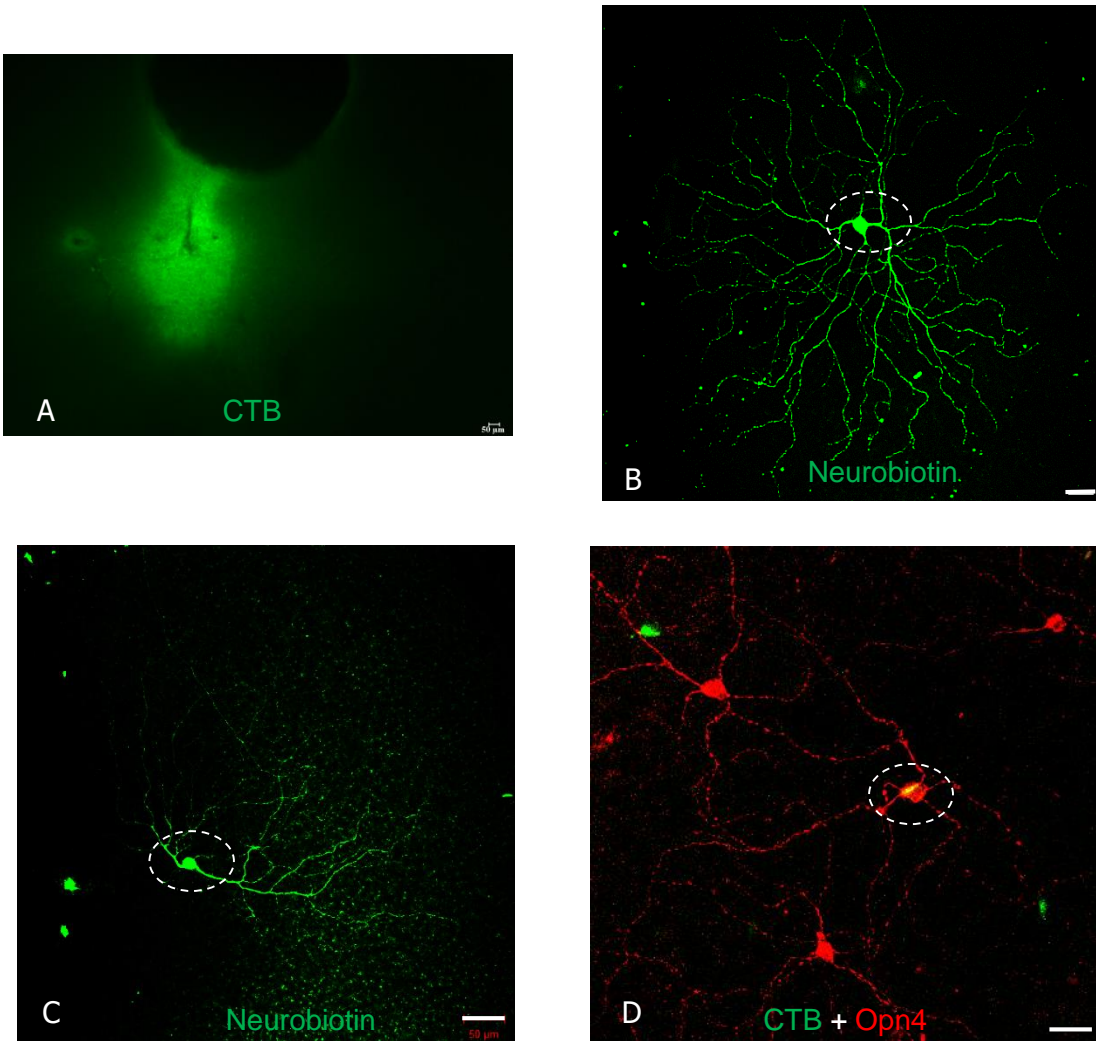

### Types of DRN projecting RGCs

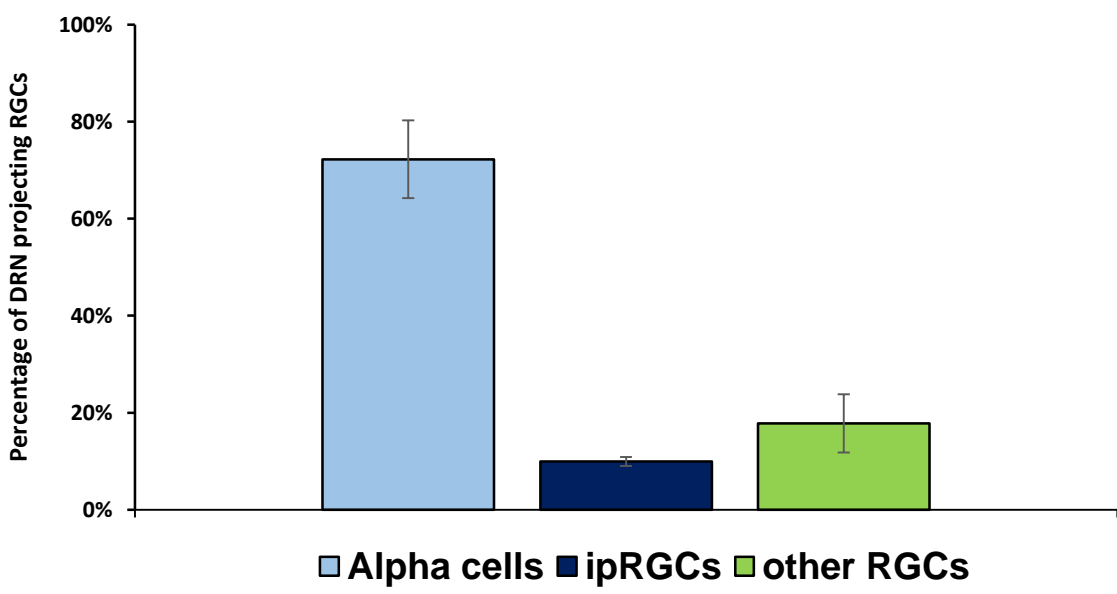

Figure S5

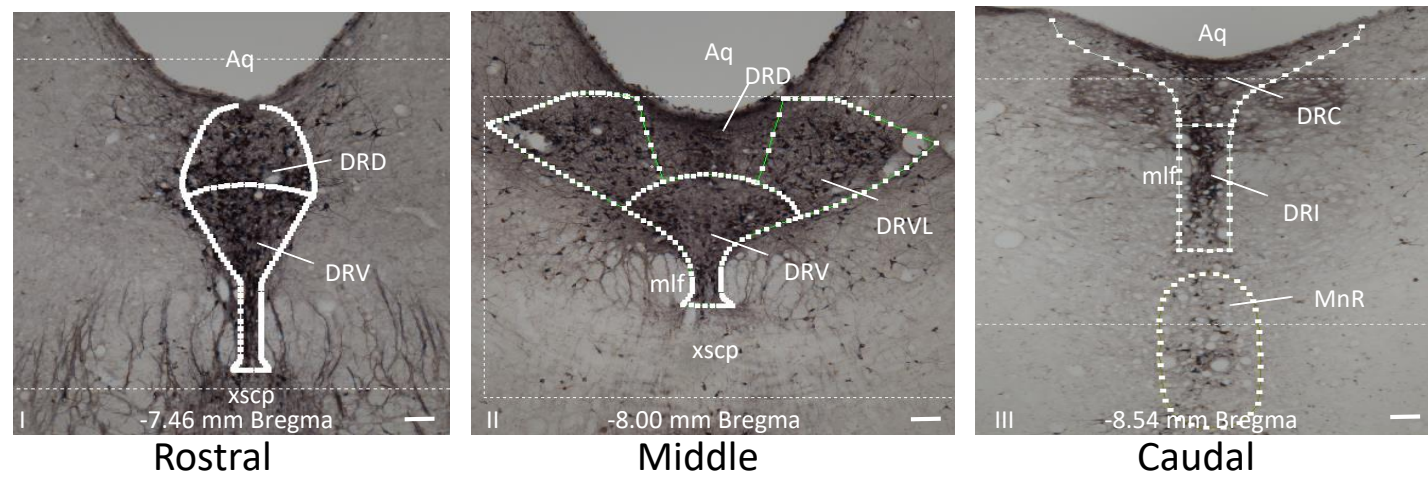

**A c-Fos expression in rostral portion of DRN**

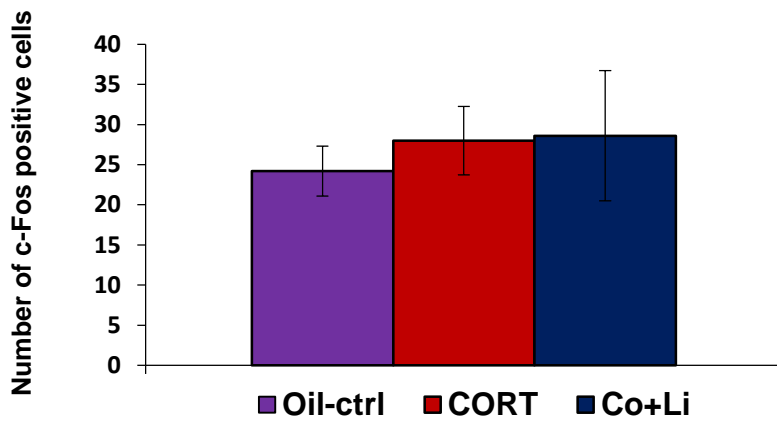

**B c-Fos expression in middle portion of DRN**

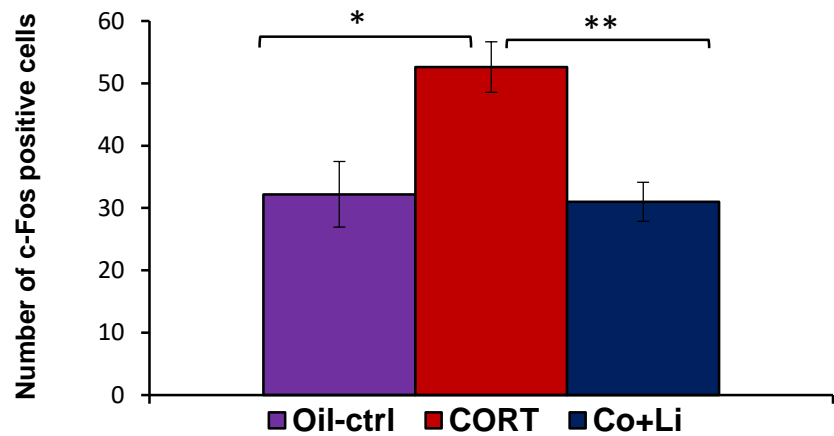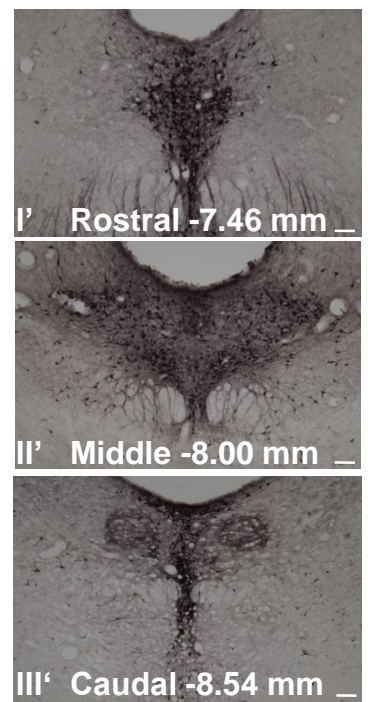

**C c-Fos expression in caudal portion of DRN**

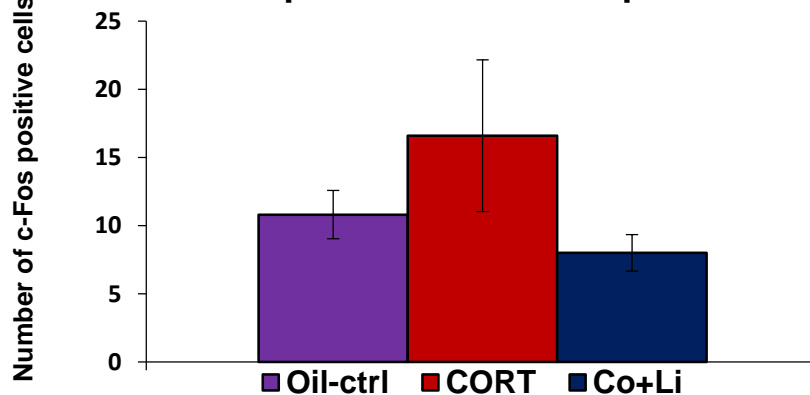



Figure S5

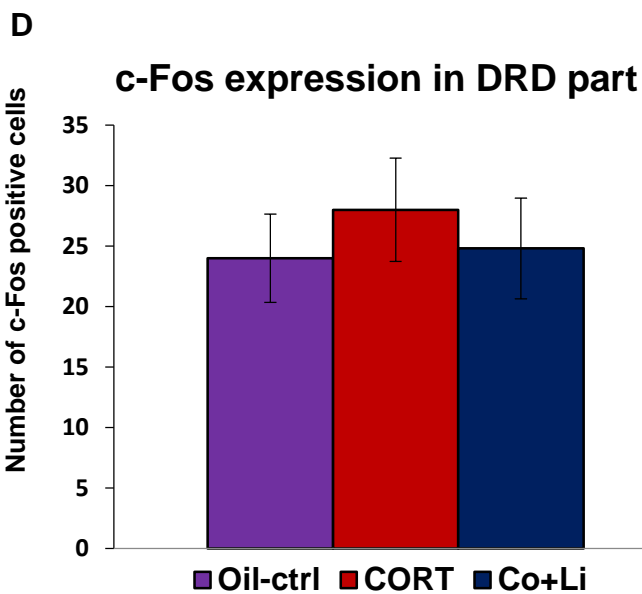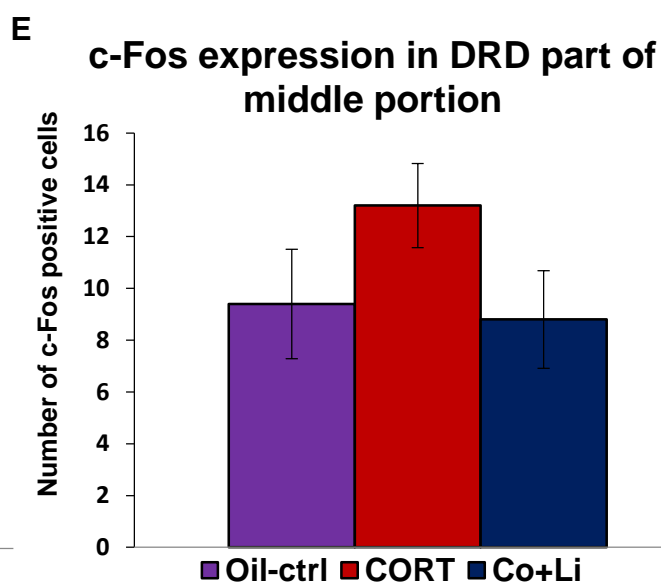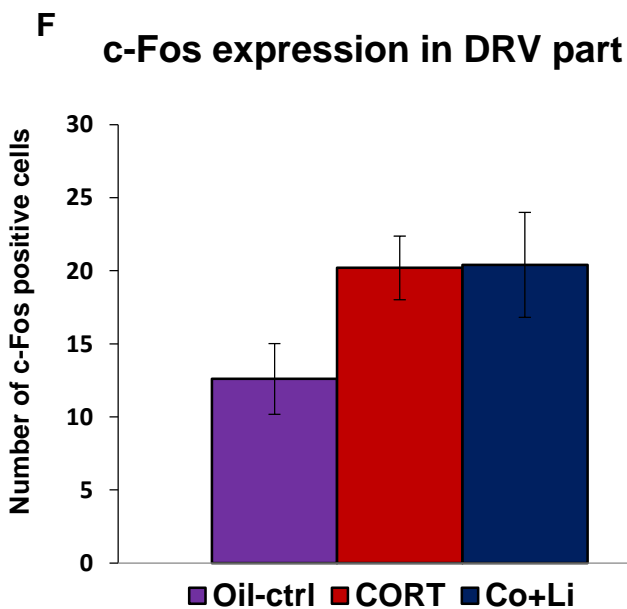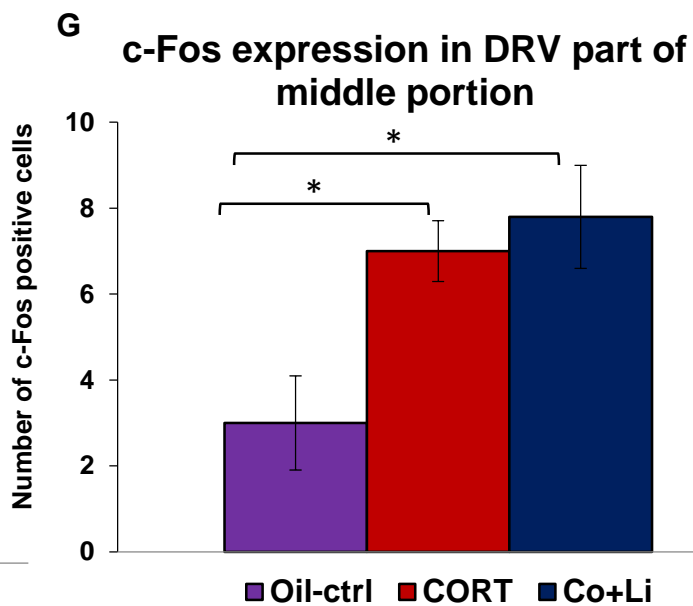

Figure S6

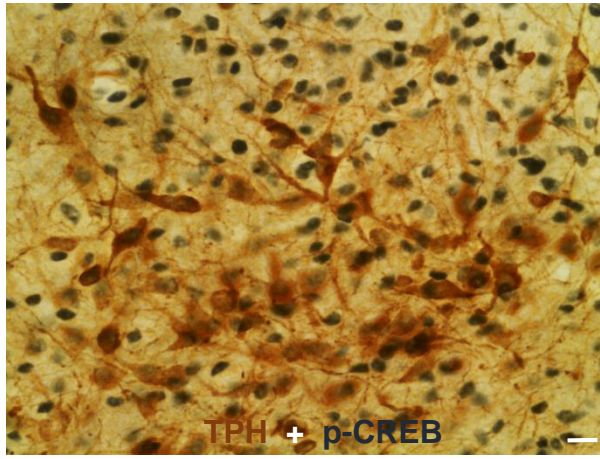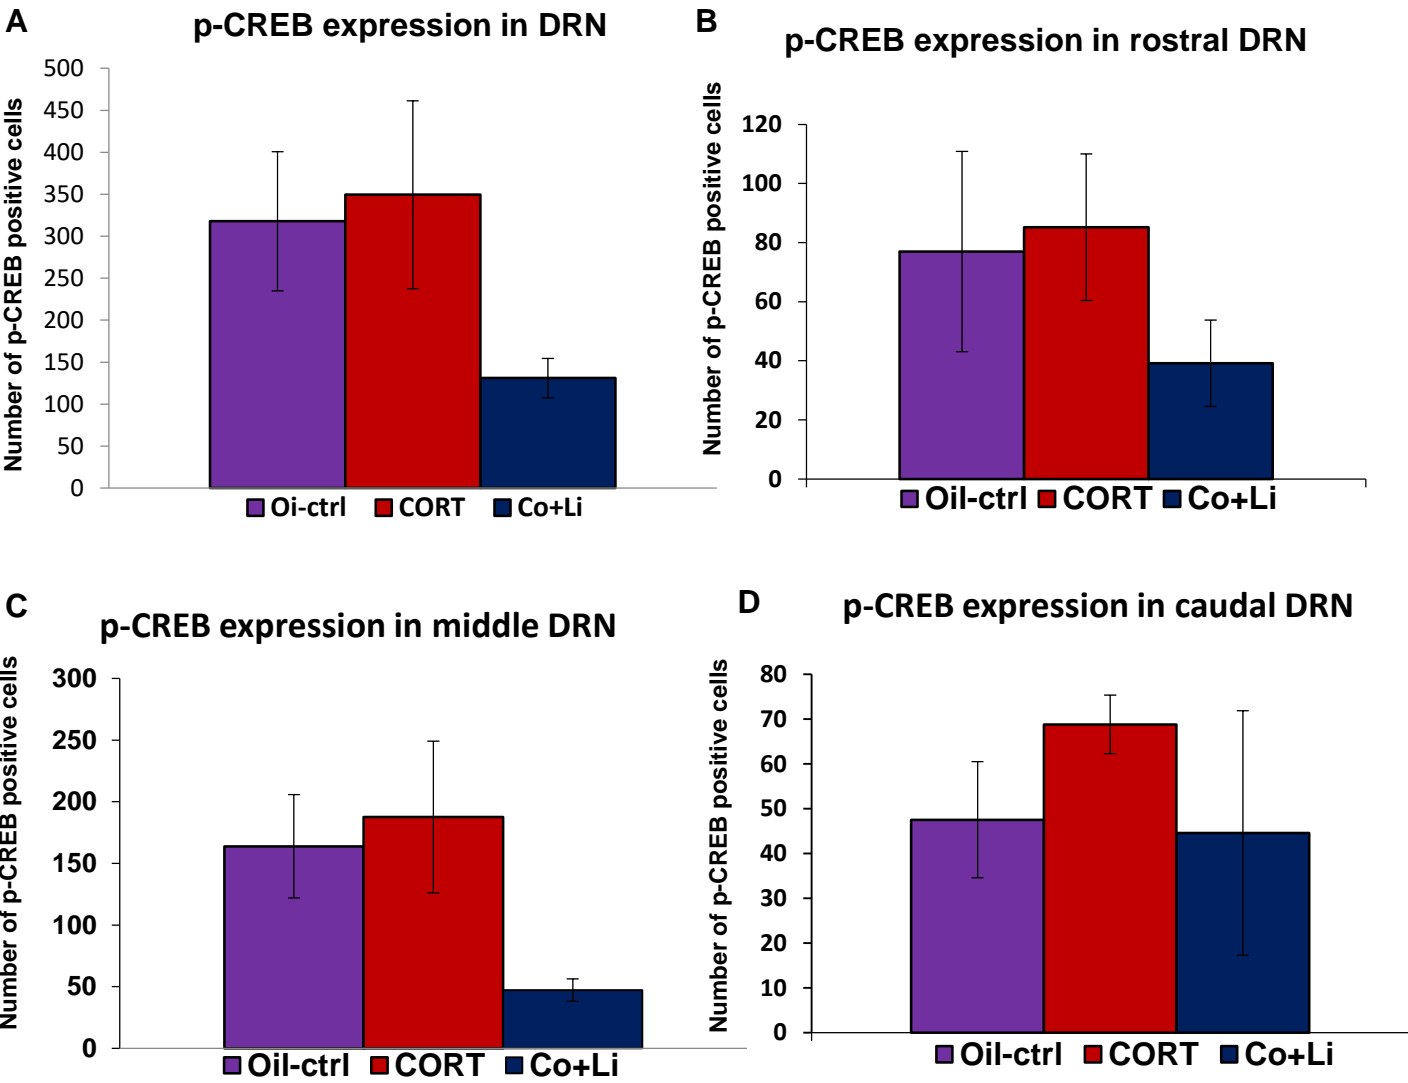

Figure S7

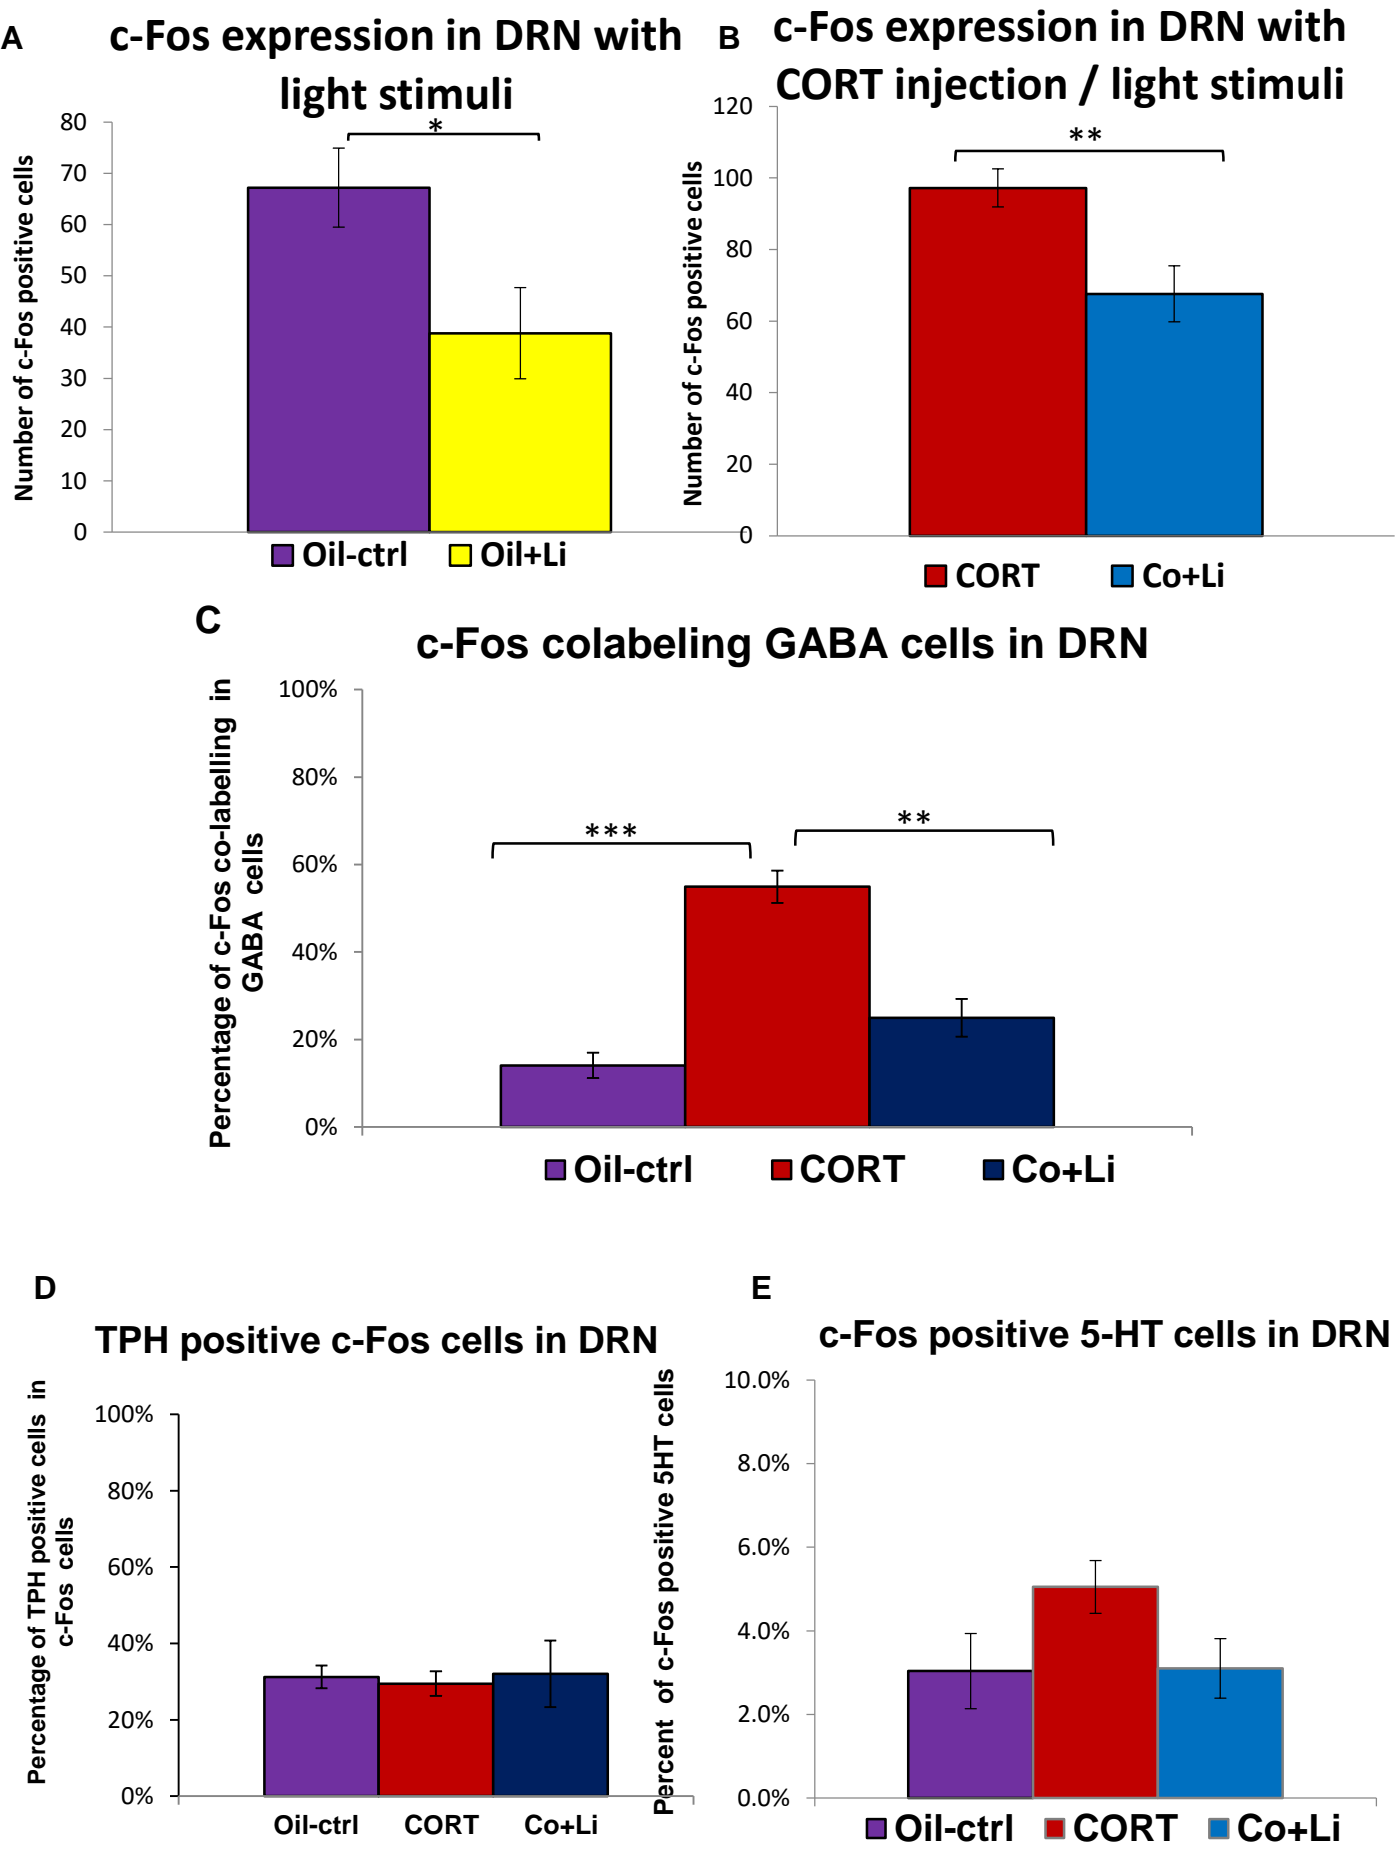

Figure S8

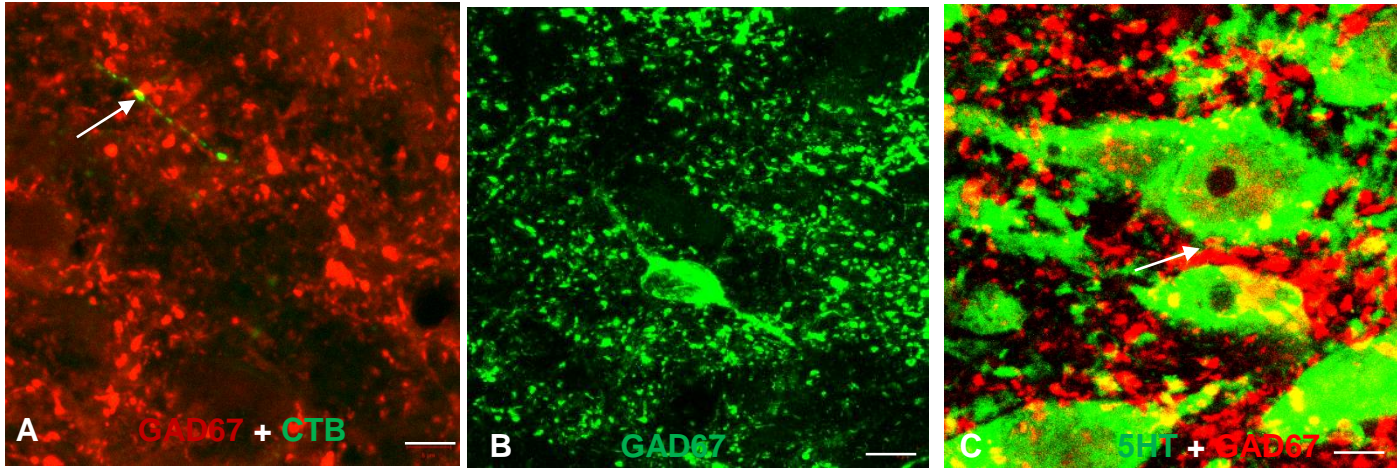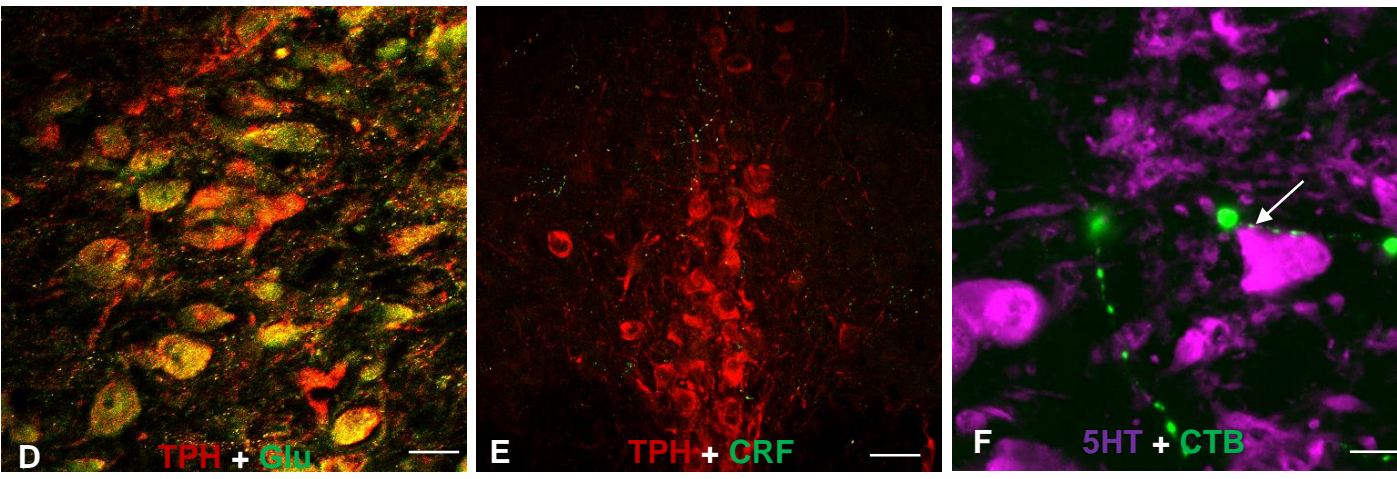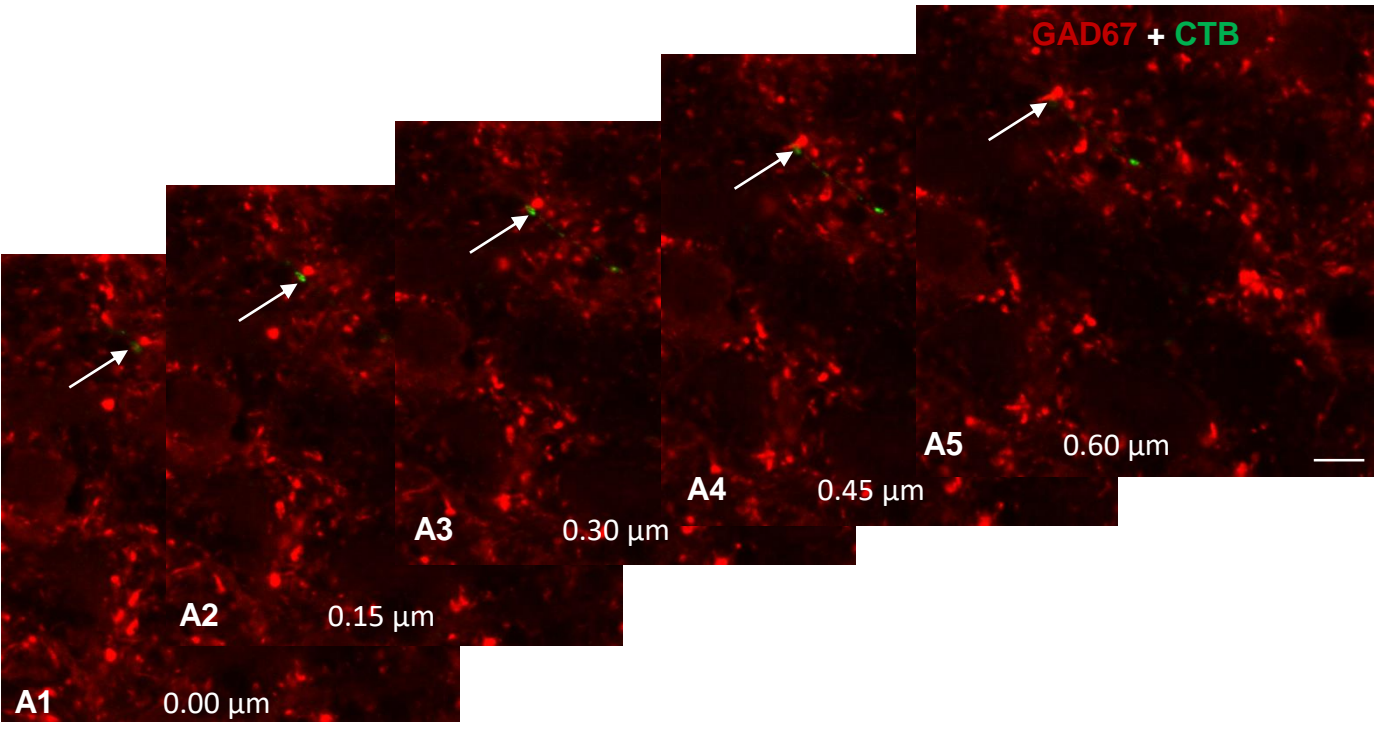

Figure S9

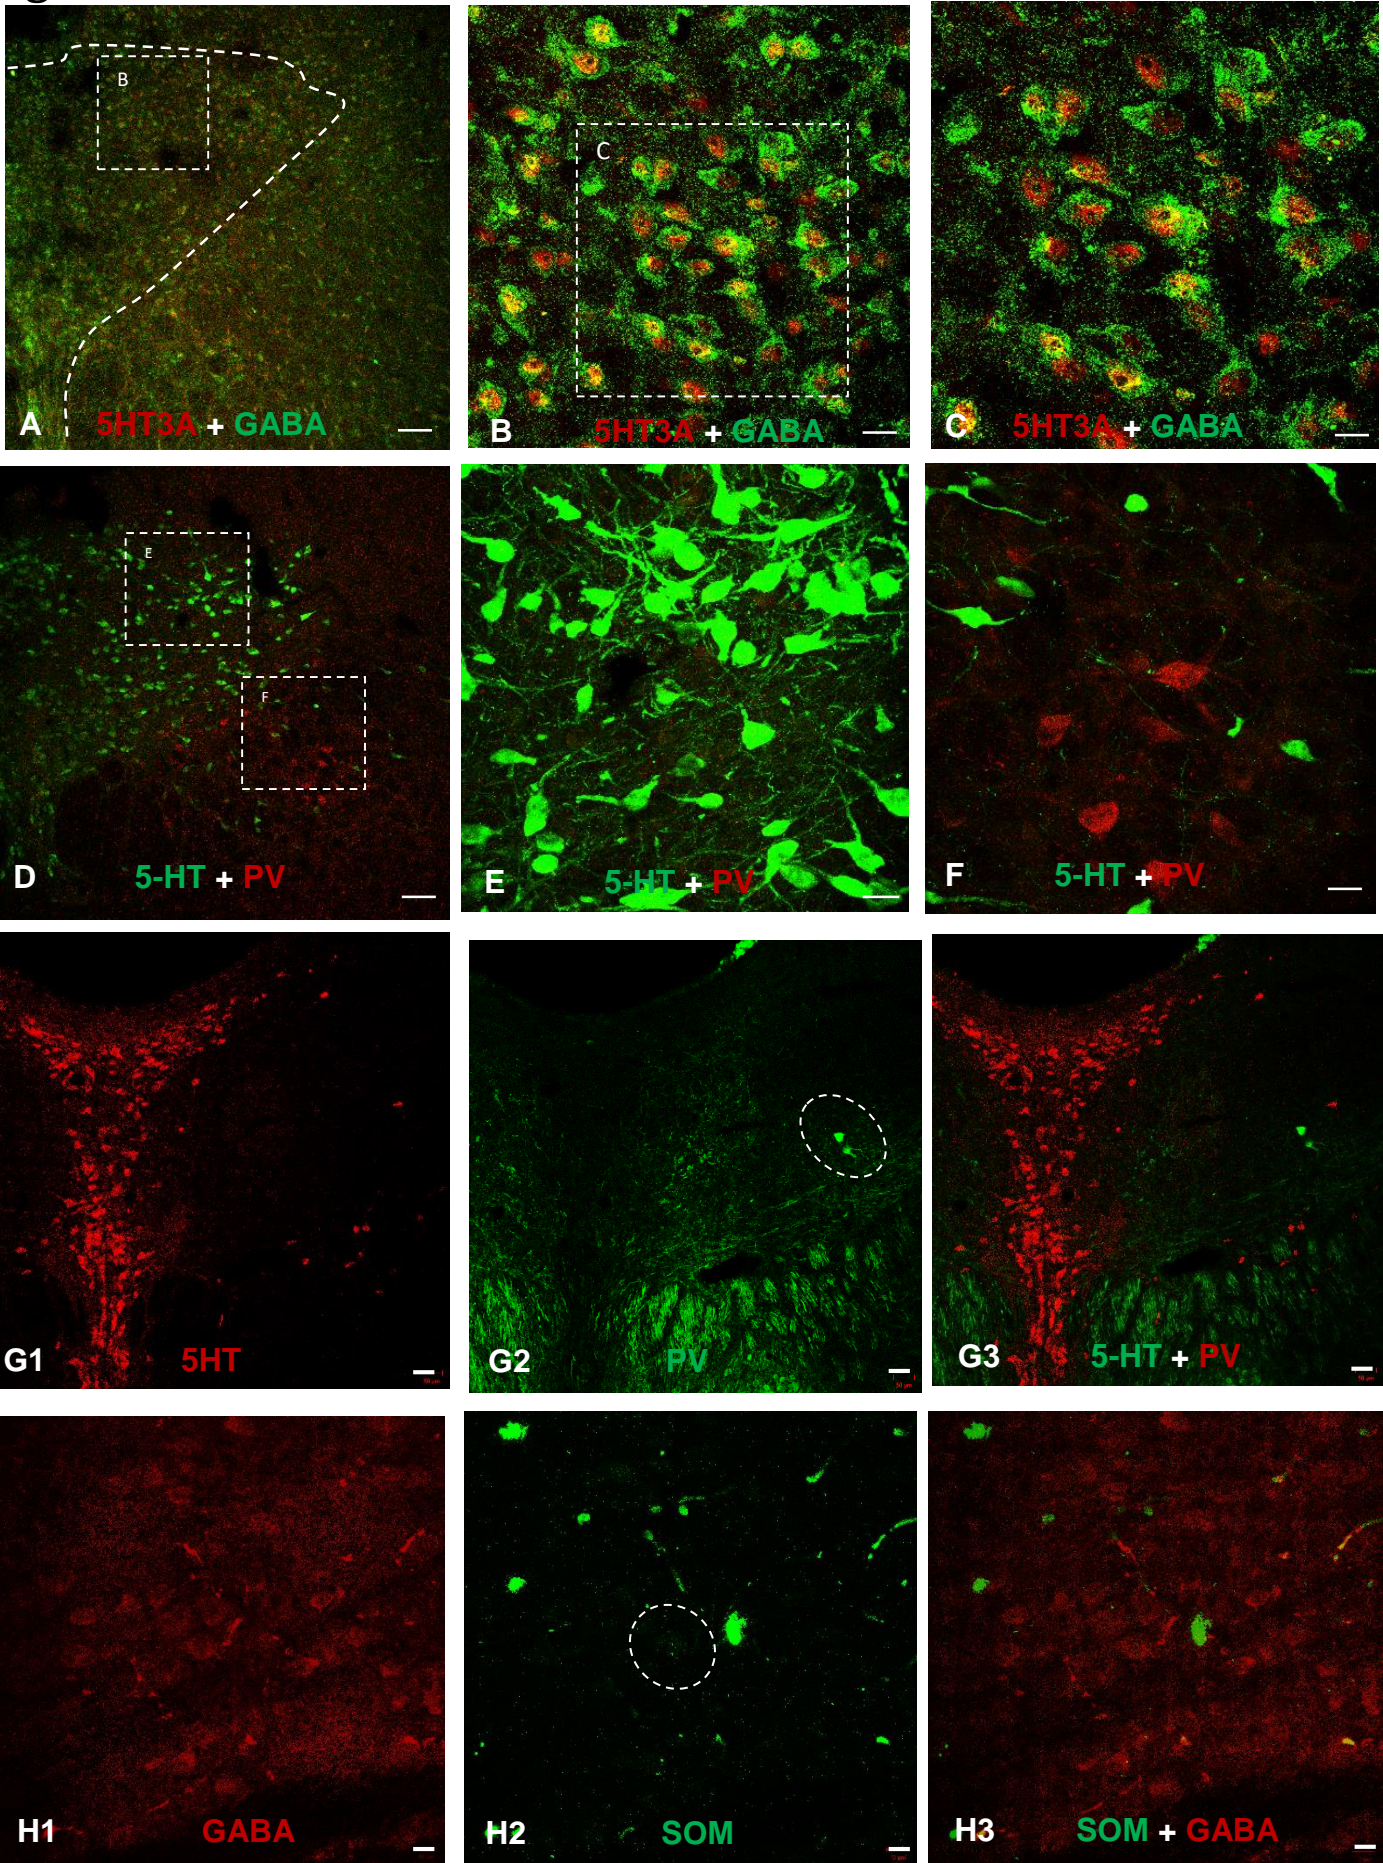

Figure S10

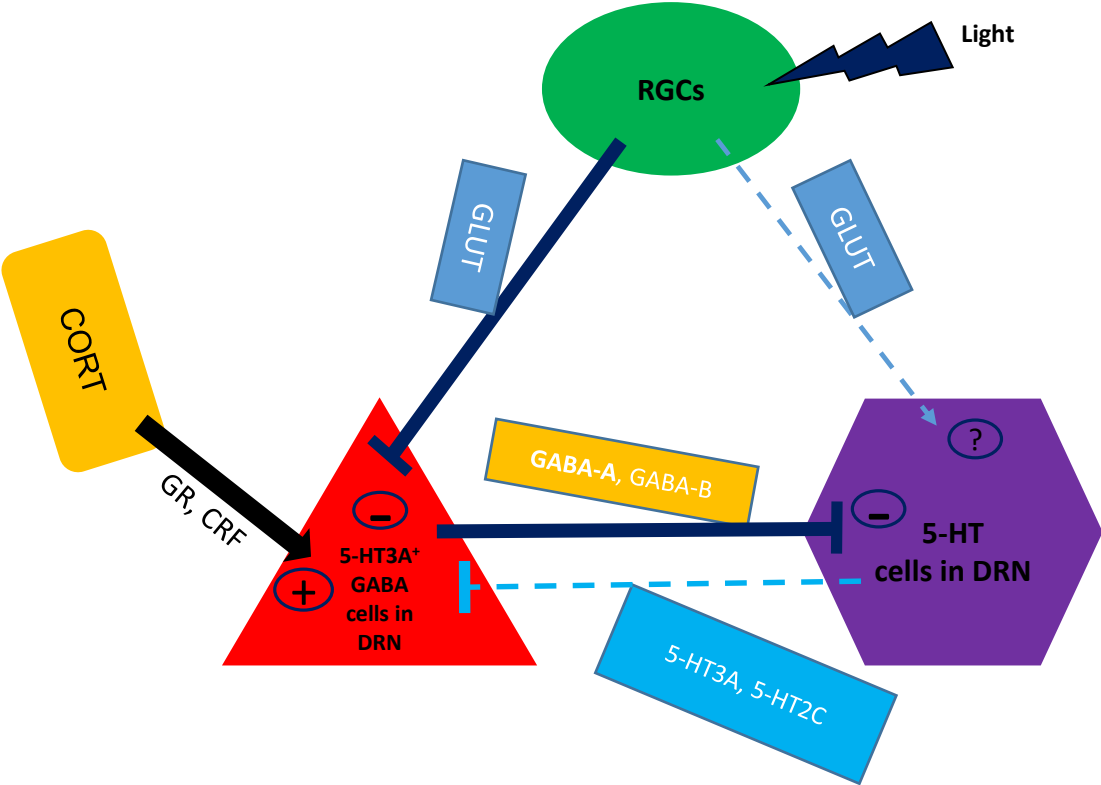

Supplement: Supplementary file [file media-2.pdf]
